# Supplementary material for: Uranyl ion coordination with rigid aromatic carboxylates and structural characterization of their complexes
Source: Royal Society of Chemistry journal article supplement (doi:10.1039/c3cc43358g), 2013-01-01
Supplement: c3cc43358g.pdf [file c3cc43358g.pdf]

# Electronic Supplementary Information:

## **Uranyl ion coordination with rigid aromatic carboxylates and structural characterization of their complexes**

Aaron C. Sather, Orion B. Berryman, Curtis E. Moore, and Julius Rebek, Jr.\*

*The Skaggs Institute for Chemical Biology and Department of Chemistry, The Scripps Research  
Institute, 10550 North Torrey Pines Road, La Jolla California, 92037*

**e-mail: [jrebek@scripps.edu](mailto:jrebek@scripps.edu)**

## Table of Contents

|                                                                           |      |
|---------------------------------------------------------------------------|------|
| Experimental details for the synthesis of reported compounds...           | S-3  |
| NMR Spectra.....                                                          | S-19 |
| IR Spectra.....                                                           | S-41 |
| Liquid-Liquid Extraction.....                                             | S-48 |
| Crystallographic Data for $\text{UO}_2(\mathbf{4})_2(\text{pyr})_2$ ..... | S-51 |
| Crystallographic Data for $\text{UO}_2(\mathbf{4})_3$ .....               | S-53 |
| Crystallographic Data for $\text{UO}_2(\mathbf{9})$ .....                 | S-55 |
| Crystallographic Data for $\text{UO}_2(\mathbf{10})$ .....                | S-57 |
| References.....                                                           | S-59 |

## Experimental Details for the Synthesis of Reported Compounds

All NMR spectra were taken on a Bruker 600 MHz instrument using Top Spin software to acquire the data. After acquisition spectra were prepared using the MestReNova software package for Mac. The references to all known compounds can be found at the end of the ESI.

### Beta ketoester (1)<sup>1</sup>

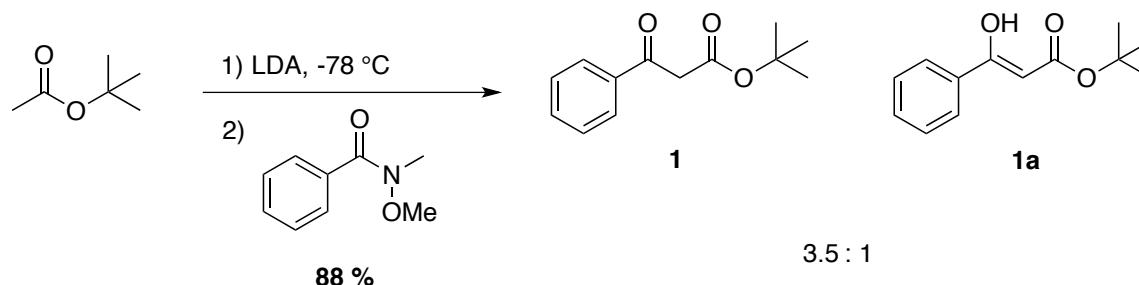

*Tert*-Butyl acetate (2 g, 17.2 mmol) was added to a flame dried round bottom flask and dissolved in dry THF (20 mL). The reaction mixture was cooled to -78 °C and 2 M LDA (8.6 mL) was added dropwise. The reaction mixture was stirred for 15 min before a solution of *N*-methoxy-*N*-methylbenzamide (2.58 g, 15.64 mmol) in dry THF (5 mL) was added dropwise. The reaction mixture was stirred at -78 °C for 2 h and warmed to room temperature. The pale yellow solution was poured into 1 M HCl (20 mL), extracted with Et<sub>2</sub>O (3x50 mL), dried over MgSO<sub>4</sub>, and concentrated to give a red/orange oil. The crude material was purified by silica gel column chromatography using 9:1 hexanes:EtOAc as the eluent to give **1** as a yellow oil. In solution, the compound is a mixture of tautomers (3.5:1) and the peaks of the major isomer are reported. Yield 3.021 g (88 %). <sup>1</sup>H NMR (600 MHz, CDCl<sub>3</sub>) δ 7.99 – 7.95 (m, 2H), 7.61 (t, *J* = 7.4, 1H), 7.53 – 7.48 (m, 2H), 3.92 (s, 2H), 1.46 (s, *J* = 3.9, 9H). ESI-TOF high-acc: *m/z*: 221.1170 ([MH]<sup>+</sup>, C<sub>13</sub>H<sub>16</sub>O<sub>3</sub>H<sup>+</sup>, calc. 221.1172).

### 1,3-diketone (2)

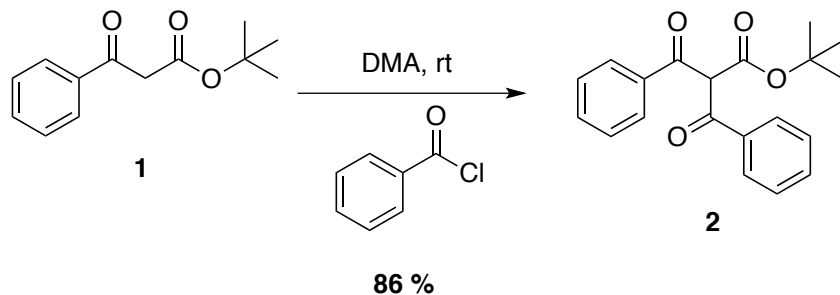

Beta ketoester **1** (2.83 g, 12.8 mmol) and benzoyl chloride (1.8 g, 12.8 mmol) was dissolved in 5 mL *N,N*-Dimethylaniline (DMA). The orange solution was stirred at room temperature overnight (~20 h) giving a dark blue solution. The reaction mixture was poured into Et<sub>2</sub>O (100 mL), washed with ice cold 10 % HCl (3x75 mL), dried over Na<sub>2</sub>SO<sub>4</sub>, and evaporated to dryness to give **2** as a white crystalline solid. Yield 2.904 g (86 %). <sup>1</sup>H NMR (600 MHz, CDCl<sub>3</sub>) δ 7.92 (d, J = 8.2, 4H), 7.67 – 7.54 (m, 2H), 7.53 – 7.42 (m, 4H), 6.06 (s, 1H), 1.43 (s, 9H). <sup>13</sup>C NMR (151 MHz, CDCl<sub>3</sub>) δ 191.26, 164.90, 135.94, 133.98, 129.02, 128.69, 83.66, 65.52, 27.89. ESI-TOF high-acc: m/z: 325.1426 ([MH]<sup>+</sup>, C<sub>20</sub>H<sub>20</sub>O<sub>4</sub>H<sup>+</sup>, calc. 325.1434).

***Tert*-Butyl-3,5-diphenyl-1H-pyrazole-4-carboxylate (**3**)**

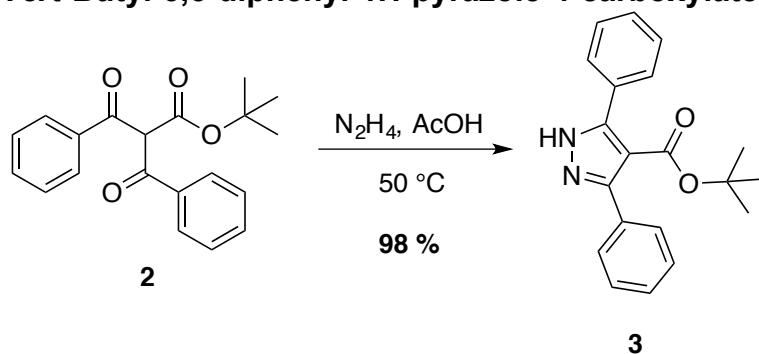

1,3-diketone **2** (0.500 g, 1.54 mmol) was dissolved in glacial acetic acid (5 mL). Anhydrous hydrazine (0.109 g, 3.4 mmol) was added dropwise and the reaction mixture was heated to  $50\text{ }^\circ\text{C}$  overnight (~20 h). The reaction mixture was evaporated to dryness to give a solid. The crude material was purified by silica gel column chromatography using 5 % EtOAc in DCM as the eluent to give **3** as a white solid. Yield 0.485 g (98 %).  $^1\text{H}$  NMR (600 MHz,  $\text{CDCl}_3$ )  $\delta$  7.61 (m, 7.6, 4H), 7.47 – 7.39 (m, 6H), 1.28 (s, 9H).  $^{13}\text{C}$  NMR (151 MHz,  $\text{CDCl}_3$ )  $\delta$  162.99, 150.21, 130.59, 129.22, 129.16, 128.35, 111.24, 81.27, 27.94. ESI-TOF high-acc:  $m/z$ : 321.1597 ( $[\text{MH}]^+$ ,  $\text{C}_{20}\text{H}_{20}\text{N}_2\text{O}_2\text{H}^+$ , calc. 321.1597).

### 3,5-diphenyl-1H-pyrazole-4-carboxylic acid (**4**)

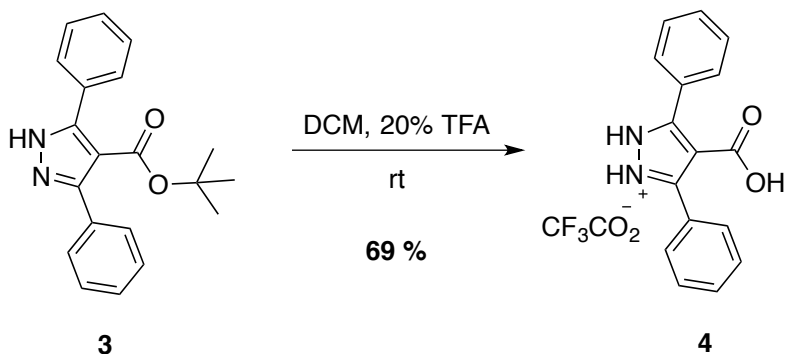

*Tert*-Butyl-3,5-diphenyl-1H-pyrazole-4-carboxylate, **3** (0.250 g, 0.78 mmol) was dissolved in 26 mL DCM. TFA (5 mL) was added dropwise and the reaction mixture was stirred overnight. The reaction mixture was evaporated to dryness, suspended in 5 mL DCM, and sonicated for 1 min. The suspension was filtered and washed with DCM to give **4** as a white free flowing solid. Yield 0.203 g (69 %). <sup>1</sup>H NMR (600 MHz, DMSO) δ 7.63 (d, J = 7.0, 4H), 7.44 (m, 23.8, 6H). <sup>13</sup>C NMR (151 MHz, DMSO) δ 165.57, 128.60, 128.08, 109.21, 99.13, 97.54. ESI-TOF high-acc: m/z: 265.0981 ([MH]<sup>+</sup>, C<sub>16</sub>H<sub>12</sub>N<sub>2</sub>O<sub>2</sub>H<sup>+</sup>, calc. 265.0977).

### Trialdehyde (**3**)<sup>2</sup>

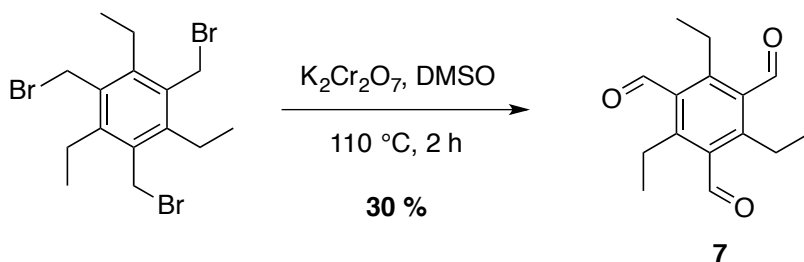

Potassium dichromate (6.0 g, 20.4 mmol) was suspended in dry DMSO (44 mL) and heated under vigorous stirring at 30 °C until dissolution. Under a nitrogen atmosphere 1,3,5-tris(bromomethyl)-2,4,6-triethylbenzene (2.00g, 4.5 mmol) was added and the reaction mixture was heated to 110 °C for 2 h. The dark mixture was poured into 175 mL of 10 M NaOH and extracted with  $CH_2Cl_2$  (3x50 mL). The combined organic layers were washed with water (3x50 mL), dried over  $Na_2SO_4$  and concentrated to give a pale yellow oil. The crude product was purified by silica gel column chromatography using 2:1 DCM:Hex as the eluent to give **7** as a white waxy solid. Yield 0.315 g (30 %).  $^1H$  NMR (600 MHz, Chloroform- $d$ )  $\delta$  10.61 (s, 1H), 3.00 (q,  $J$  = 7.4 Hz, 2H), 1.27 (t,  $J$  = 7.6 Hz, 3H).

### Methyl 3-Iodobiphenyl-2-carboxylate (**S1**)<sup>3,4</sup>

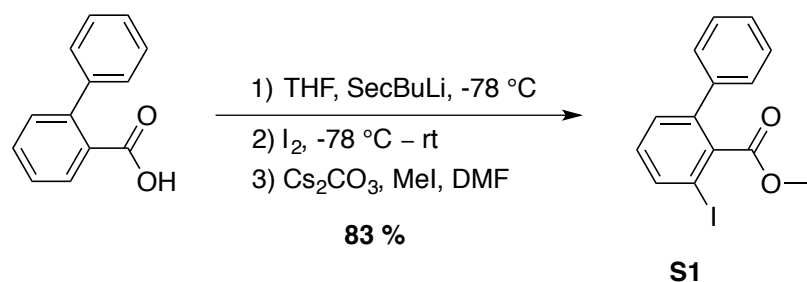

sBuLi (1.3 M in cyclohexane, 44 mL, 57.2 mmol) was added dropwise under argon at -78 °C, over a period of 30 min, to a vigorously stirred solution of biphenyl-2-carboxylic acid (5 g, 25.22 mmol) in anhydrous THF (180 mL). A deep red-orange coloration appeared during addition of the organolithium. After 2.5 h stirring at -78 °C, a solution of I<sub>2</sub> (19.19 g, 75.2 mmol) in anhydrous THF (100 mL) was added dropwise. The solution was then allowed to warm to room temperature over night. The mixture was transferred to a 1000 mL round bottom flask and evaporated to dryness. The crude mixture was dissolved in Et<sub>2</sub>O (500 mL) and transferred to a separatory funnel. The organic layer was washed with a saturated sodium sulfite solution (250 mL). The aqueous layer was removed and the organic solution was washed with a saturated sodium bicarbonate solution (300 mL). The aqueous layers were combined and washed with Et<sub>2</sub>O (200 mL). The aqueous layer was acidified with concentrated HCl to give a bright yellow mixture. The yellow aqueous mixture was extracted with Et<sub>2</sub>O (3 x 250 mL). The combined organic layers were dried over Na<sub>2</sub>SO<sub>4</sub> and evaporated to dryness to give an off white solid. Yield 7.226 g (88 %). This crude product was used without further purification.

Cs<sub>2</sub>CO<sub>3</sub> (8.76 g, 26.9 mmol) and methyl iodide (2.08 mL, 33.60 mmol) were added to a solution of the above crude product (7.226 g) in DMF (30 mL). The suspension was stirred for 0.5 h at room temperature, after which the solvents were removed by rotary evaporation. The remaining solids were extracted with DCM (250 mL) and washed with a saturated solution of sodium bicarbonate (2 x 250 mL) and brine (150 mL). The organic layer was separated, dried over MgSO<sub>4</sub>, and concentrated to dryness to give a white waxy solid, **S1**. Yield 7.54 g (95 %). <sup>1</sup>H NMR (600 MHz, Chloroform-d) δ 7.84 (d, *J* = 7.6 Hz, 1H), 7.41 – 7.34 (m, 6H), 7.18 – 7.14 (m, 1H), 3.67 (s, 3H). <sup>13</sup>C NMR (151 MHz, CDCl<sub>3</sub>) δ 169.47, 141.70, 139.70, 139.49, 138.09, 130.85, 129.61, 128.56, 128.35, 128.14, 92.68, 52.62. ESI-TOF high-acc: *m/z*: 338.9883 ([MH]<sup>+</sup>, C<sub>14</sub>H<sub>11</sub>IO<sub>2</sub>H<sup>+</sup>, calc. 338.9877).



### Methyl 4-Bromo-1,1':3',1''-terphenyl-2'-carboxylate (**6**)<sup>5</sup>

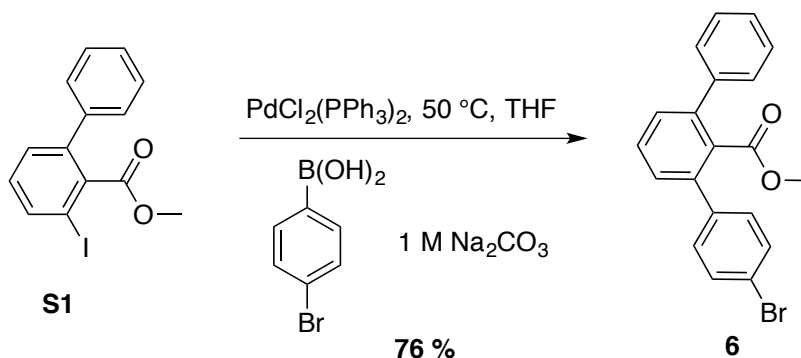

4-Bromophenylboronic acid (1.78 g, 8.86 mmol) was added to methyl 3-iodobiphenyl-2-carboxylate **S1** (2.00 g, 5.91 mmol) in THF (20 mL) and 1 M aqueous  $\text{Na}_2\text{CO}_3$  (15 mL). The reaction mixture was deoxygenated by bubbling argon through it for 20 min, after which  $[\text{PdCl}_2(\text{PPh}_3)_2]$  (0.210 g, 5 mol%) was added. The reaction mixture was heated to 50 °C, and the brownish orange-red emulsion turned yellow after 1 h. After 6 h, the reaction mixture was cooled to room temperature. Water (50 mL) was added and the product extracted with  $\text{CH}_2\text{Cl}_2$  (2x50 mL). The combined organic phases were dried with  $\text{MgSO}_4$ , filtered, and concentrated to dryness. The crude material was dissolved in  $\text{CH}_2\text{Cl}_2$ , added to a sample of silica gel and evaporated to dryness. The material was then purified with silica gel column chromatography using 95:5 hexanes:diethyl ether as the eluent to give **6** as a white solid. Yield 1.65 g (76 %).  $^1\text{H}$  NMR (600 MHz, Chloroform- $d$ )  $\delta$  7.56 – 7.49 (m, 3H), 7.42 – 7.33 (m, 7H), 7.28 (d,  $J$  = 8.6 Hz, 2H), 3.40 (s, 3H).  $^{13}\text{C}$  NMR (151 MHz,  $\text{CDCl}_3$ )  $\delta$  169.80, 140.67, 140.44, 139.55, 139.21, 132.80, 131.62, 130.21, 129.66, 129.35, 128.79, 128.50, 128.47, 127.79, 122.10, 52.06. ESI-TOF high-acc:  $m/z$ : 367.0321 ( $[\text{MH}]^+$ ,  $\text{C}_{20}\text{H}_{15}\text{BrO}_2\text{H}^+$ , calc. 367.0328).

### Terphenyl benzylic alcohol (8)

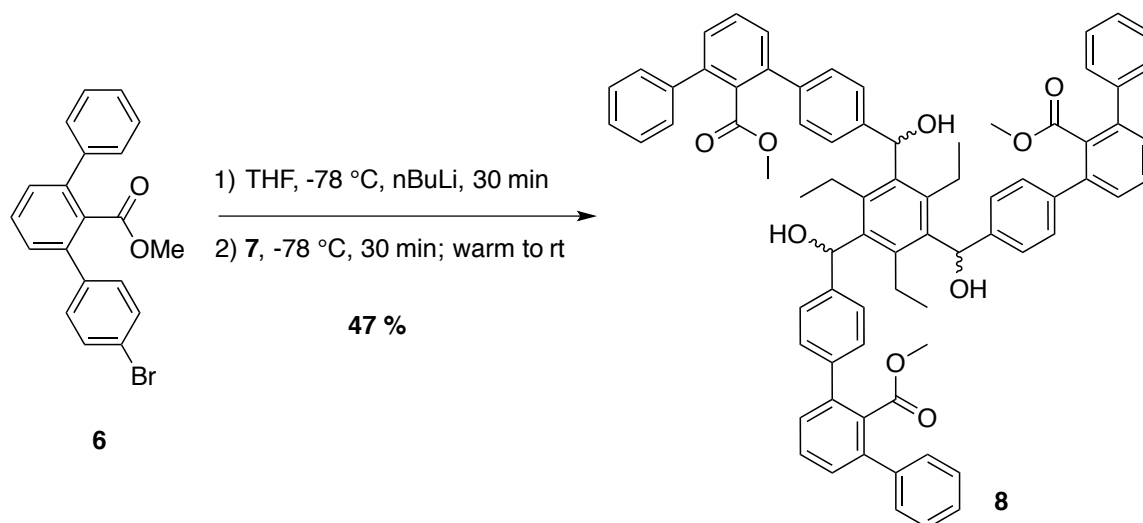

Methyl 4-Bromo-1,1':3',1''-terphenyl-2'-carboxylate **6** (1.267 g, 3.45 mmol) was added to a flame dried two-neck round bottom flask and placed under an N<sub>2</sub> atmosphere. Dry THF (50 mL) was added to the flask and the reaction mixture was cooled to -78 °C. Once cool, a 1.6 M soln of nBuLi (1.97 mL, 3.16 mmol) was added dropwise giving a yellow solution. After stirring the reaction mixture at -78 °C for 0.5 h, a solution of **7** (0.236 g, 0.958 mmol) in THF (8 mL) was added dropwise. The reaction mixture was stirred at -78 °C for 1 h and then warmed to room temperature, giving an orange solution. The reaction mixture was quenched with water (5 mL) and washed with 10 % HCl (2x50 mL) and brine (50 mL). The organic phase was dried over Na<sub>2</sub>SO<sub>4</sub> and concentrated to dryness. The crude solid was purified with silica gel column chromatography using 7:4 Hex:EtOAc as the eluent to give a white foam which is a mixture of diastereomers that was used without further purification. Yield 0.501 g (47 %). ESI-TOF high-acc: m/z: 1111.4772 ([MH]<sup>+</sup>, C<sub>75</sub>H<sub>66</sub>O<sub>9</sub>H<sup>+</sup>, calc. 1111.4779).

### Terphenyl triethylbenzene triketone alcohol methylester (S9)

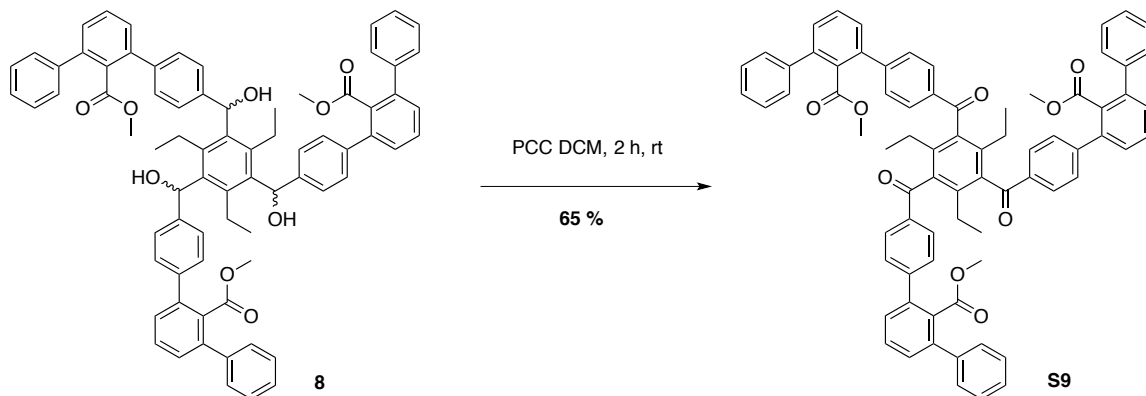

PCC (0.305 g, 1.42 mmol) was suspended in DCM (50 mL) and stirred. To the stirring mixture a solution of **8** (0.350 g, 0.315 mmol) in DCM (5 mL) was added dropwise. The reaction was stirred for 2 hours at room temperature and 0.300 g celite was added. The suspension was filtered and the filtrate was evaporated to dryness to give a brown solid. The crude material was dissolved in  $\text{CH}_2\text{Cl}_2$ , added to a sample of silica gel and evaporated to dryness. The resulting solid was purified with silica gel column chromatography using 5:1 Hex:EtOAc as the eluent to give **S9** as an off white foam. Yield 0.225 g (65 %).  $^1\text{H}$  NMR (600 MHz,  $\text{CDCl}_3$ )  $\delta$  7.94 (bs, 5H), 7.53 (m, 9H), 7.39 (bs, 22H), 3.33 (bs, 9H), 2.53 (bs, 2H), 2.28 (bs, 4H), 1.07 (bs, 3H), 0.84 (bs, 6H).  $^{13}\text{C}$  NMR (151 MHz,  $\text{CDCl}_3$ )  $\delta$  198.23, 169.44, 146.60, 146.44, 140.76, 140.19, 139.07, 138.19, 138.14, 136.36, 132.67, 129.77, 129.64, 129.03, 128.59, 128.40, 128.33, 127.73, 51.89, 25.39, 24.36, 16.34, 15.46. ESI-TOF high-acc:  $m/z$ : 1127.4121 ( $[\text{MNa}]^+$ ,  $\text{C}_{75}\text{H}_{60}\text{O}_9\text{Na}^+$ , calc. 1127.4129).

## Terphenyl triethylbenzene triketone carboxylic acid (**9**)

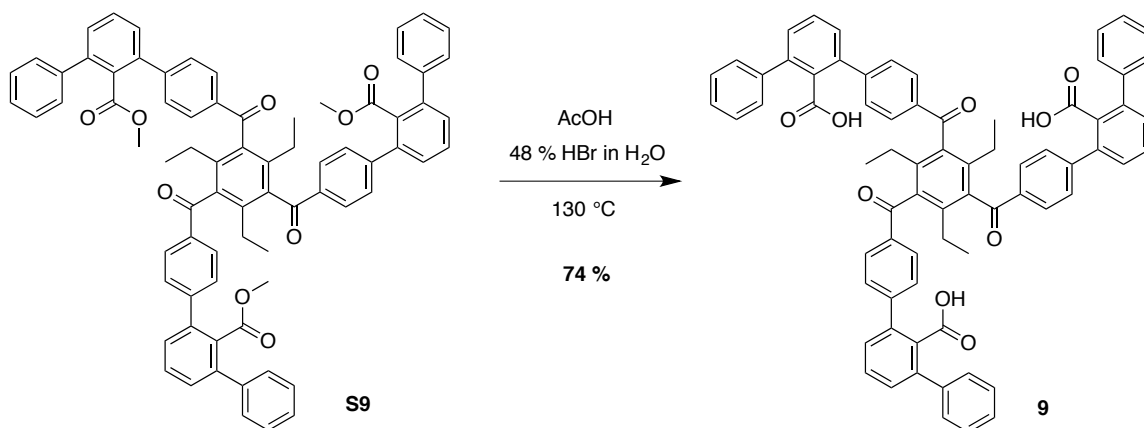

**S9** (0.075, 0.0068 mmol) was dissolved in glacial acetic acid (3 mL). The mixture was stirred and 48 % HBr in H<sub>2</sub>O was added dropwise (0.5 mL) causing a precipitate to form. The suspension was heated to 130 °C overnight, forming a solution upon warming. After stirring at 130 °C for 17 h an off white suspension forms. The reaction mixture is cooled to room temperature and the mixture is sonicated to break up the precipitate into a fine powder. The reaction mixture was filtered and washed with water. The off white solid **9** was dried overnight under vacuum. Yield 0.054 g (74 %). <sup>1</sup>H NMR (600 MHz, Methanol-d<sub>4</sub>) δ 8.02 – 7.89 (m, 6H), 7.67 (d, *J* = 7.7 Hz, 5H), 7.60 – 7.52 (m, 4H), 7.44 – 7.34 (m, 21H), 2.50 (s, 2H), 2.27 (s, 4H), 1.04 (s, 6H), 0.84 (s, 3H). <sup>13</sup>C NMR (151 MHz, MeOD) δ 148.40, 141.78, 141.37, 139.71, 139.43, 137.58, 135.28, 131.01, 130.89, 130.75, 130.66, 130.39, 129.75, 129.66, 129.45, 129.41, 129.32, 128.80, 128.68, 26.26, 25.30, 16.56, 15.85. ESI-TOF high-acc: *m/z*: 1085.3646 ([MNa]<sup>+</sup>, C<sub>72</sub>H<sub>54</sub>O<sub>9</sub><sup>+</sup>, calc. 1085.366).

### Terphenyl triethylbenzene methylester (S10)

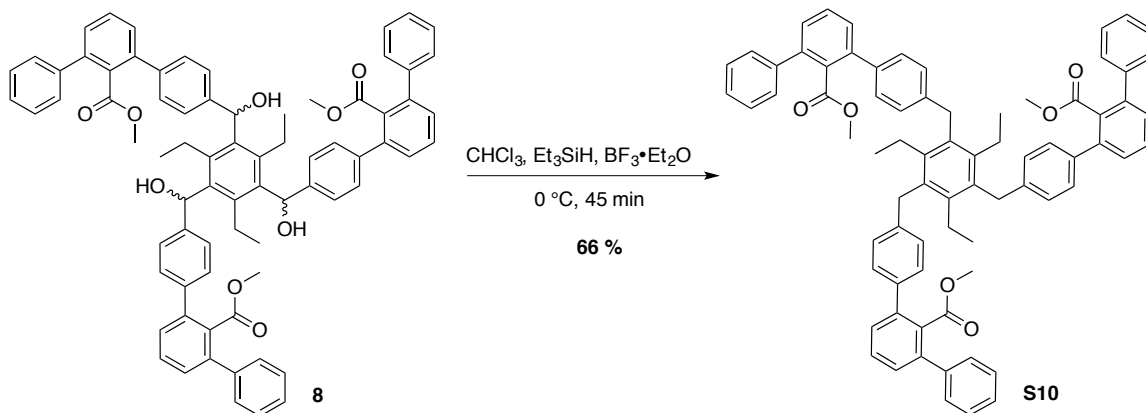

**8** (0.300 g, 0.27 mmol) was dissolved in dry  $\text{CHCl}_3$  (30 mL) and cooled to  $0\text{ }^\circ\text{C}$  under a  $\text{N}_2$  atmosphere. Triethylsilane (1.08 mL, 6.75 mmol) was added dropwise to the reaction mixture followed by the addition of  $\text{BF}_3 \cdot \text{Et}_2\text{O}$  (0.5 mL, 4.05 mmol). The reaction mixture was stirred at  $0\text{ }^\circ\text{C}$  for 1 h and then warmed to room temperature. The reaction was quenched by the addition of 10 % HCl (30 mL) and extracted with DCM. The combined organic layers were washed with brine, dried over  $\text{MgSO}_4$ , and concentrated to dryness. The crude material was purified with silica gel column chromatography starting with toluene as the eluent and gradually changing to 2:1 toluene:DCM to give an off white foam. Yield 0.190 g (66 %).  $^1\text{H}$  NMR (600 MHz,  $\text{CDCl}_3$ )  $\delta$  7.46 (t,  $J = 7.7$ , 3H), 7.41 – 7.31 (m, 21H), 7.28 (d,  $J = 8.2$ , 6H), 7.05 (d,  $J = 8.1$ , 6H), 4.19 (s, 6H), 3.29 (s, 9H), 2.53 (q,  $J = 7.1$ , 6H), 1.07 (t,  $J = 7.4$ , 9H).  $^{13}\text{C}$  NMR (151 MHz,  $\text{CDCl}_3$ )  $\delta$  170.02, 141.48, 140.96, 140.68, 140.37, 140.27, 138.07, 134.09, 132.84, 129.44, 128.97, 128.79, 128.51, 128.48, 128.39, 127.88, 127.60, 51.81, 34.57, 23.89, 15.28. ESI-TOF high-acc:  $m/z$ : 1063.4932 ( $[\text{MH}]^+$ ,  $\text{C}_{75}\text{H}_{66}\text{O}_6\text{H}^+$ , calc. 1063.4932).

### Terphenyl triethylbenzene carboxylic acid (**10**)

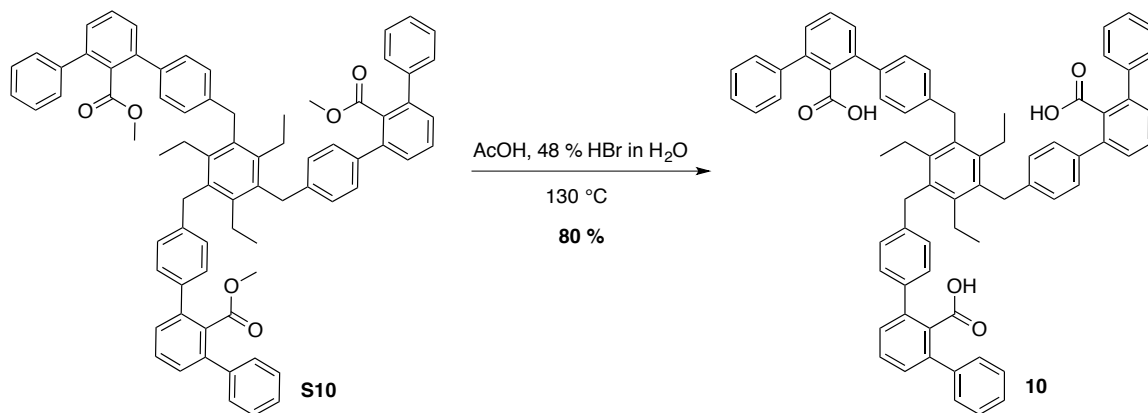

**S10** (0.142 g, 0.13 mmol) was dissolved in glacial acetic acid (5 mL). The mixture was stirred and 48 % HBr in H<sub>2</sub>O was added dropwise (1 mL) causing a precipitate to form. The suspension was heated to 130 °C overnight, forming a solution upon warming. After stirring at 130 °C for 17 h an off white suspension formed. The reaction mixture was cooled to room temperature and the mixture was sonicated to break up the precipitate into a fine powder. The reaction mixture was filtered and washed with water. The off white solid **10** was dried overnight under vacuum. Yield 0.109 g (80 %). <sup>1</sup>H NMR (600 MHz, MeOD) δ 7.53 – 7.23 (m, 30H), 7.08 (d, J = 7.8, 6H), 4.23 (s, 6H), 2.54 (q, J = 7.4, 6H), 1.09 (t, J = 7.4, 9H). <sup>13</sup>C NMR (151 MHz, MeOD) δ 173.73, 142.63, 142.14, 142.00, 140.97, 140.83, 139.52, 139.37, 135.09, 130.15, 130.07, 129.76, 129.70, 129.35, 129.24, 128.75, 128.53, 35.30, 24.73, 15.65. ESI-TOF high-acc: m/z: 1021.4453 ([MH]<sup>+</sup>, C<sub>72</sub>H<sub>60</sub>O<sub>6</sub>H<sup>+</sup>, calc. 1021.4462).

## Synthesis of uranyl complexes with pyrazole ligand **4**

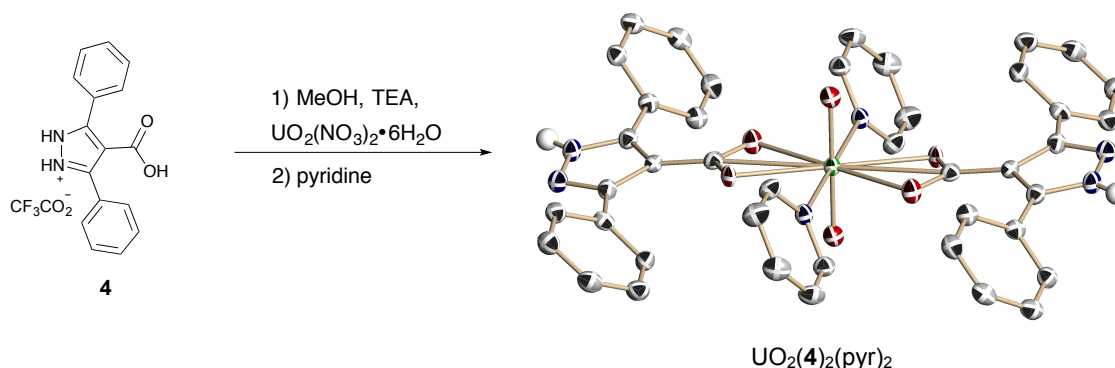

Pyrazole **4** (0.075 g, 0.198 mmol) was added to methanol (30 mL) and stirred. Triethylamine (0.060 g, 0.595 mmol) was added to the stirring mixture followed by the addition of  $\text{UO}_2(\text{NO}_3)_2 \cdot 6\text{H}_2\text{O}$  (0.048 g, 0.095 mmol) to give a yellow solution. The solution was evaporated to dryness under reduced pressure. The resulting residue was dissolved in pyridine to give a yellow solution. Upon slow diffusion of pentane at room temperature, yellow prism-like crystals suitable for X-ray diffraction formed.  $^1\text{H}$  NMR (600 MHz,  $\text{DMF}-d_7$ )  $\delta$  8.65 – 8.58 (m, 4H), 8.06 (bs, 4H), 7.84 – 7.80 (m, 2H), 7.77 (d,  $J = 7.3$  Hz, 4H), 7.58 (s, 4H), 7.46 (bd,  $J = 24.5$  Hz, 2H), 7.42 – 7.38 (m, 4H).  $^{13}\text{C}$  NMR (151 MHz,  $\text{DMF}-d_7$ )  $\delta$  166.94, 150.91, 137.14, 130.70, 130.03, 129.92, 129.31, 129.09, 125.02, 110.48. Mass: This complex was not detectable by mass spectroscopy.

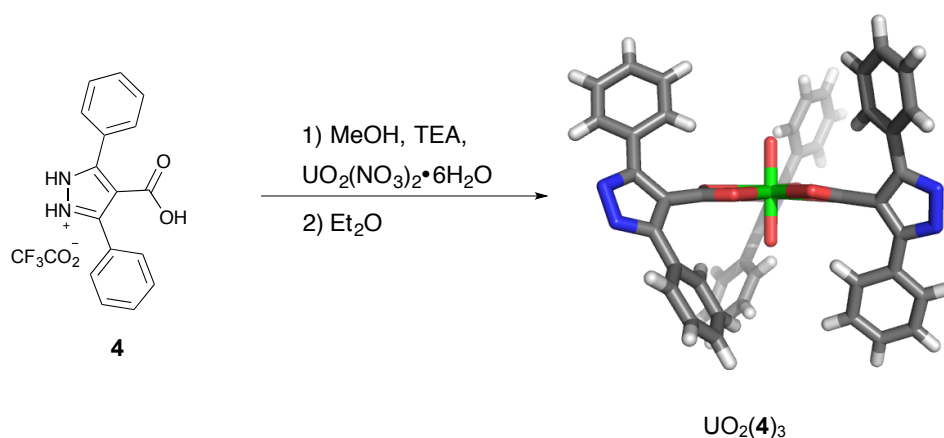

Pyrazole **4** (0.030 g, 0.08 mmol) was added to methanol (3 mL) and stirred. Triethylamine (0.025 g, 0.250 mmol) was added to the stirring mixture followed by the addition of  $\text{UO}_2(\text{NO}_3)_2 \cdot 6\text{H}_2\text{O}$  (0.014 g, 0.027 mmol) to give a yellow solution. Upon slow diffusion of  $\text{Et}_2\text{O}$  into the reaction mixture, pale yellow plate-like crystals suitable for X-ray diffraction formed.  $^1\text{H}$  NMR (600 MHz,  $\text{DMF}-d_7$ )  $\delta$  8.12 (d,  $J = 7.3$  Hz, 6H), 8.10 – 8.05 (m, 4H), 7.78 (d,  $J = 7.6$  Hz, 2H), 7.51 –

7.42 (m, 6H), 7.37 – 7.17 (m, 12H), 3.05 (s, 6H), 1.20 (t, J = 7.2 Hz, 9H).  $^{13}\text{C}$   
NMR (151 MHz, DMF- $d_7$ )  $\delta$  183.08, 129.99, 129.78, 129.21, 129.10, 128.94,  
117.05, 47.48, 10.40.

Mass: This complex was not detectable by mass spectroscopy.



## Synthesis of uranyl complex $\text{UO}_2(\mathbf{9})\cdot\text{Et}_3\text{NH}$

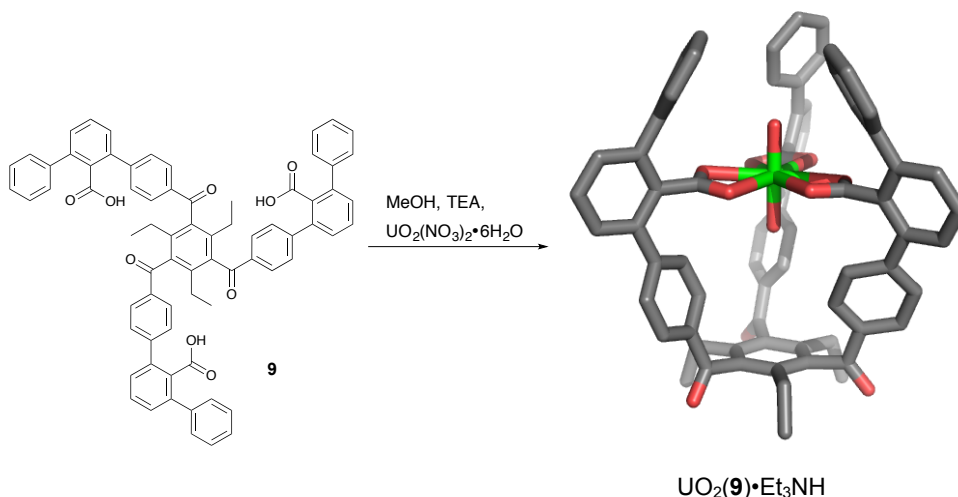

Ligand **9** (0.030 g, 0.028 mmol) was suspended in MeOH (50 mL). Triethylamine (0.009 g, 0.088 mmol) was added to give a solution.  $\text{UO}_2(\text{NO}_3)_2\cdot 6\text{H}_2\text{O}$  (0.014 g, 0.028 mmol) was dissolved in 10 mL MeOH and added dropwise to the ligand solution giving a clear, pale yellow solution. The mixture was stirred for an additional 30 minutes, evaporated to dryness, suspended in  $\text{H}_2\text{O}$  (5 mL), and triturated. The resulting suspension was filtered and washed with  $\text{H}_2\text{O}$  (20 mL) to give a pale yellow solid (0.038 g). The solid was purified by triturating with MeOH (5 mL). The suspension was filtered and the solid was collected to give  $\text{UO}_2(\mathbf{9})\cdot\text{Et}_3\text{NH}$  as an off white solid (0.015 g, 38 % yield). Single crystals suitable for X-ray diffraction were grown by layering cyclopentane onto a dilute DCM solution of the crude material (without MeOH trituration) at room temperature.

$^1\text{H}$  NMR (600 MHz,  $\text{DMF}-d_7$ )  $\delta$  8.39 (s, 3H), 7.94 (d,  $J$  = 7.6 Hz, 4H), 7.79 (d,  $J$  = 7.6 Hz, 4H), 7.76 – 7.66 (m, 9H), 7.63 (d,  $J$  = 7.6 Hz, 3H), 7.25 (s, 3H), 7.16 (t,  $J$  = 7.5 Hz, 3H), 7.11 (s, 3H), 6.97 (t,  $J$  = 7.7 Hz, 4H), 3.21 (s, 6H), 2.14 (q,  $J$  = 6.7 Hz, 6H), 1.27 (s, 9H), 1.06 (t,  $J$  = 7.1 Hz, 9H).

$^{13}\text{C}$  NMR (151 MHz,  $\text{DMF}-d_7$ )  $\delta$  198.19, 145.72, 141.34, 140.42, 140.38, 138.65, 138.62, 138.26, 136.50, 135.41, 131.30, 129.95, 129.93, 129.71, 129.55, 129.02, 128.98, 128.02, 127.57, 47.29, 26.99, 17.46. ESI-TOF high-acc:  $m/z$ : 1329.4002 ( $[\text{M}-\text{H}]^-$ ,  $\text{C}_{72}\text{H}_{51}\text{O}_{11}\text{U}^-$ , calc. 1329.3945).

## Synthesis of uranyl complex $\text{UO}_2(\mathbf{10})\cdot\text{Et}_3\text{NH}$

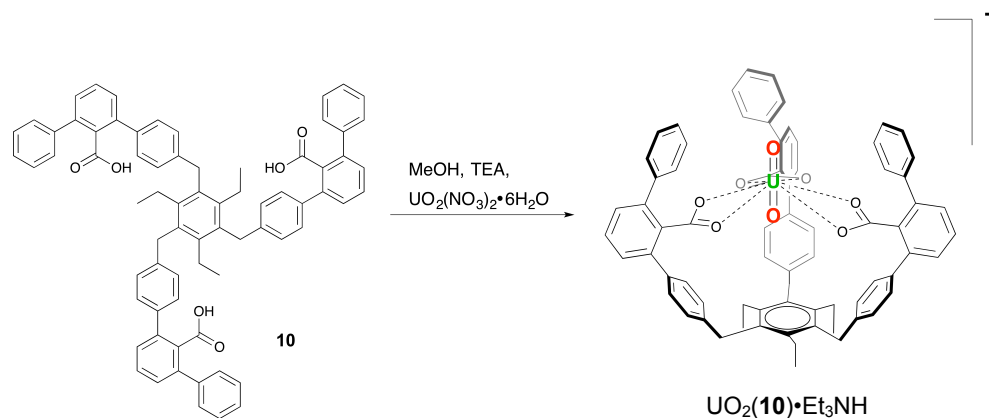

Ligand **10** (0.020 g, 0.019 mmol) was suspended in MeOH (50 mL). Triethylamine (0.006 g, 0.06 mmol) was added to give a solution.  $\text{UO}_2(\text{NO}_3)_2\cdot 6\text{H}_2\text{O}$  (0.010 g, 0.019 mmol) was dissolved in 10 mL MeOH and added dropwise to the ligand solution giving a clear, pale yellow solution. After 10 minutes stirring at room temperature a fine white precipitate forms. The mixture was stirred for an additional 30 minutes, evaporated to dryness, suspended in  $\text{H}_2\text{O}$  (5 mL), and triturated. The resulting suspension was filtered and washed with  $\text{H}_2\text{O}$  (20 mL) to give a pale yellow solid (0.026 g). The solid was purified by triturating with MeOH (5 mL). The suspension was filtered and the solid was collected to give  $\text{UO}_2(\mathbf{10})\cdot\text{Et}_3\text{NH}$  as an off white solid (0.012 g, 44 % yield).

$^1\text{H}$  NMR (600 MHz,  $\text{DMF}-d_7$ )  $\delta$  8.20 (s, 6H), 8.00 – 7.89 (m, 9H), 7.79 (t,  $J$  = 7.9 Hz, 3H), 7.70 (d,  $J$  = 7.7 Hz, 3H), 7.29 (t,  $J$  = 7.4 Hz, 3H), 7.08 (t,  $J$  = 7.8 Hz, 6H), 6.88 (d,  $J$  = 8.4 Hz, 6H), 4.12 (s, 6H), 3.44 (s, 6H), 2.62 (q,  $J$  = 7.4 Hz, 6H), 1.40 (t,  $J$  = 7.2 Hz, 9H), 1.35 (t,  $J$  = 7.3 Hz, 9H).

$^{13}\text{C}$  NMR (151 MHz,  $\text{DMF}-d_7$ )  $\delta$  186.97, 141.68, 141.20, 140.36, 140.00, 139.91, 138.46, 137.48, 135.26, 130.04, 129.91, 129.72, 129.50, 129.47, 129.18, 127.52, 47.60, 34.52, 24.81, 16.37.

ESI-TOF high-acc:  $m/z$ : 1287.4613 ( $[\text{M}-\text{H}]^-$ ,  $\text{C}_{72}\text{H}_{57}\text{O}_8\text{U}^-$ , calc. 1287.4567).

**NMR Spectra:**

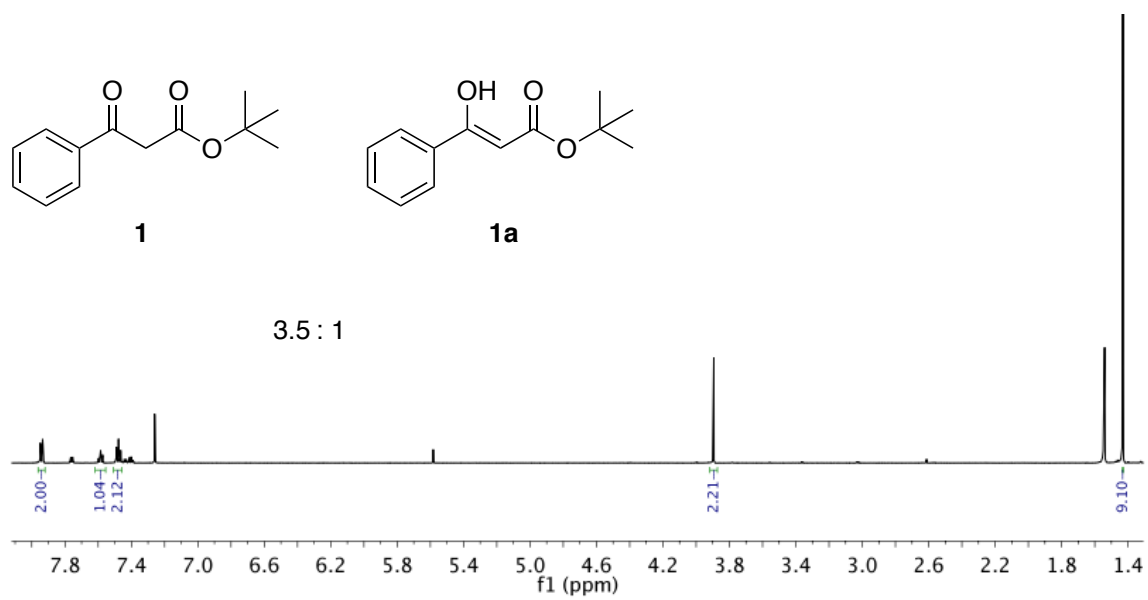

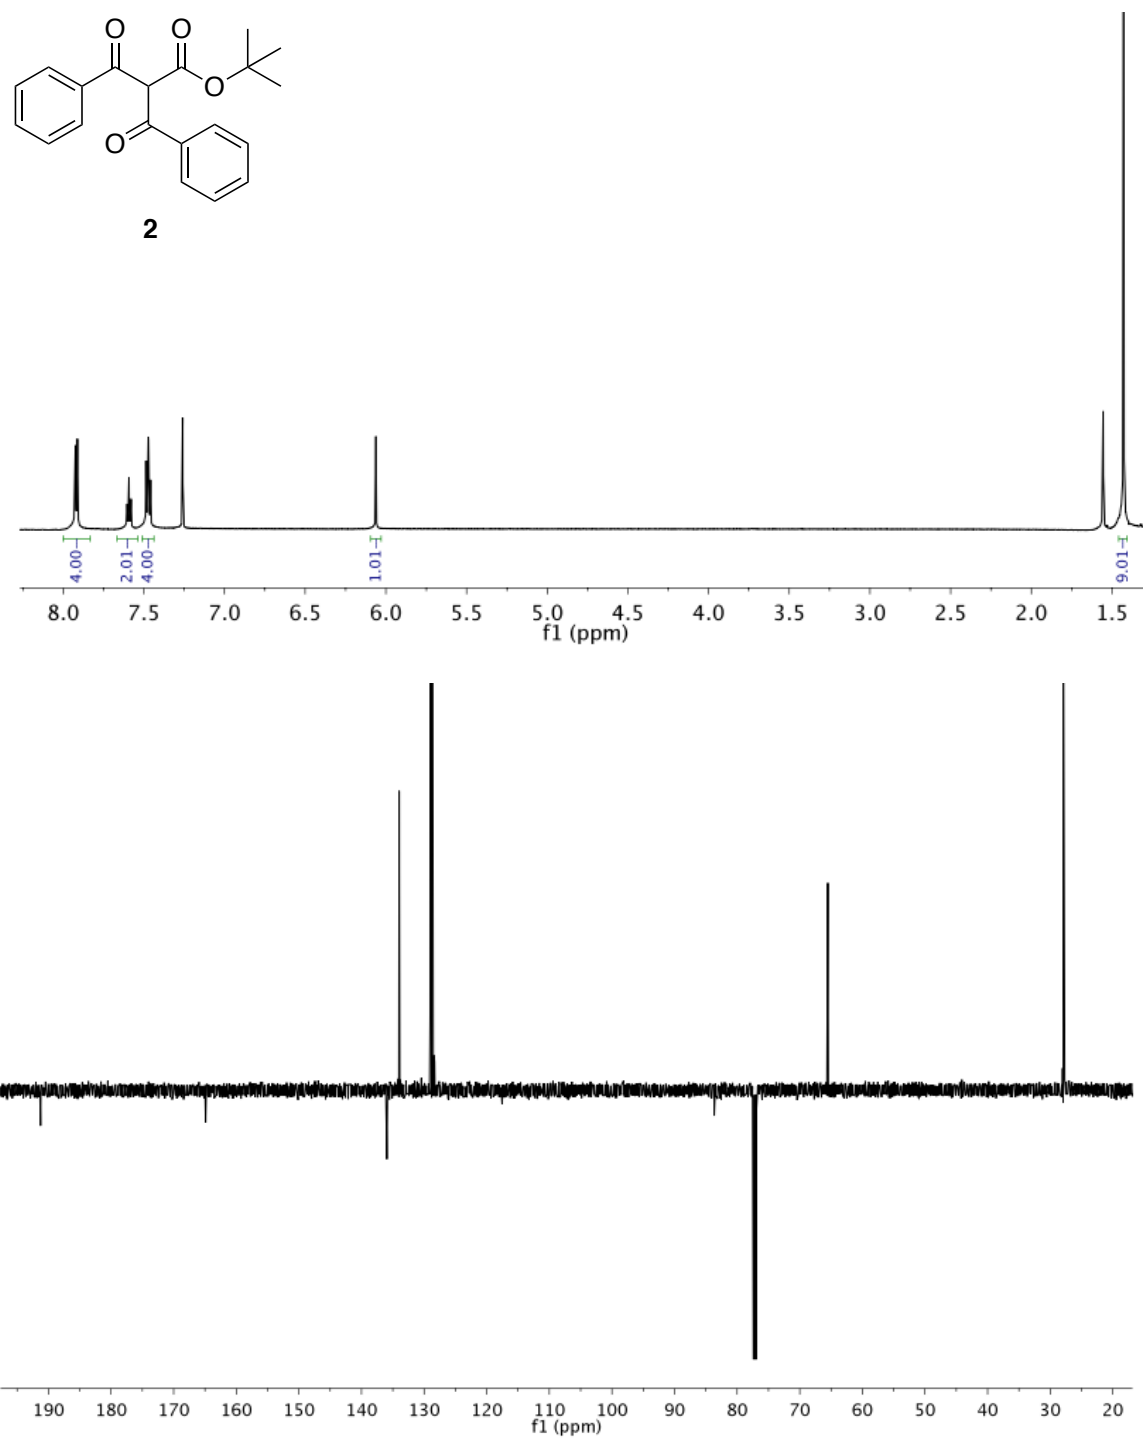

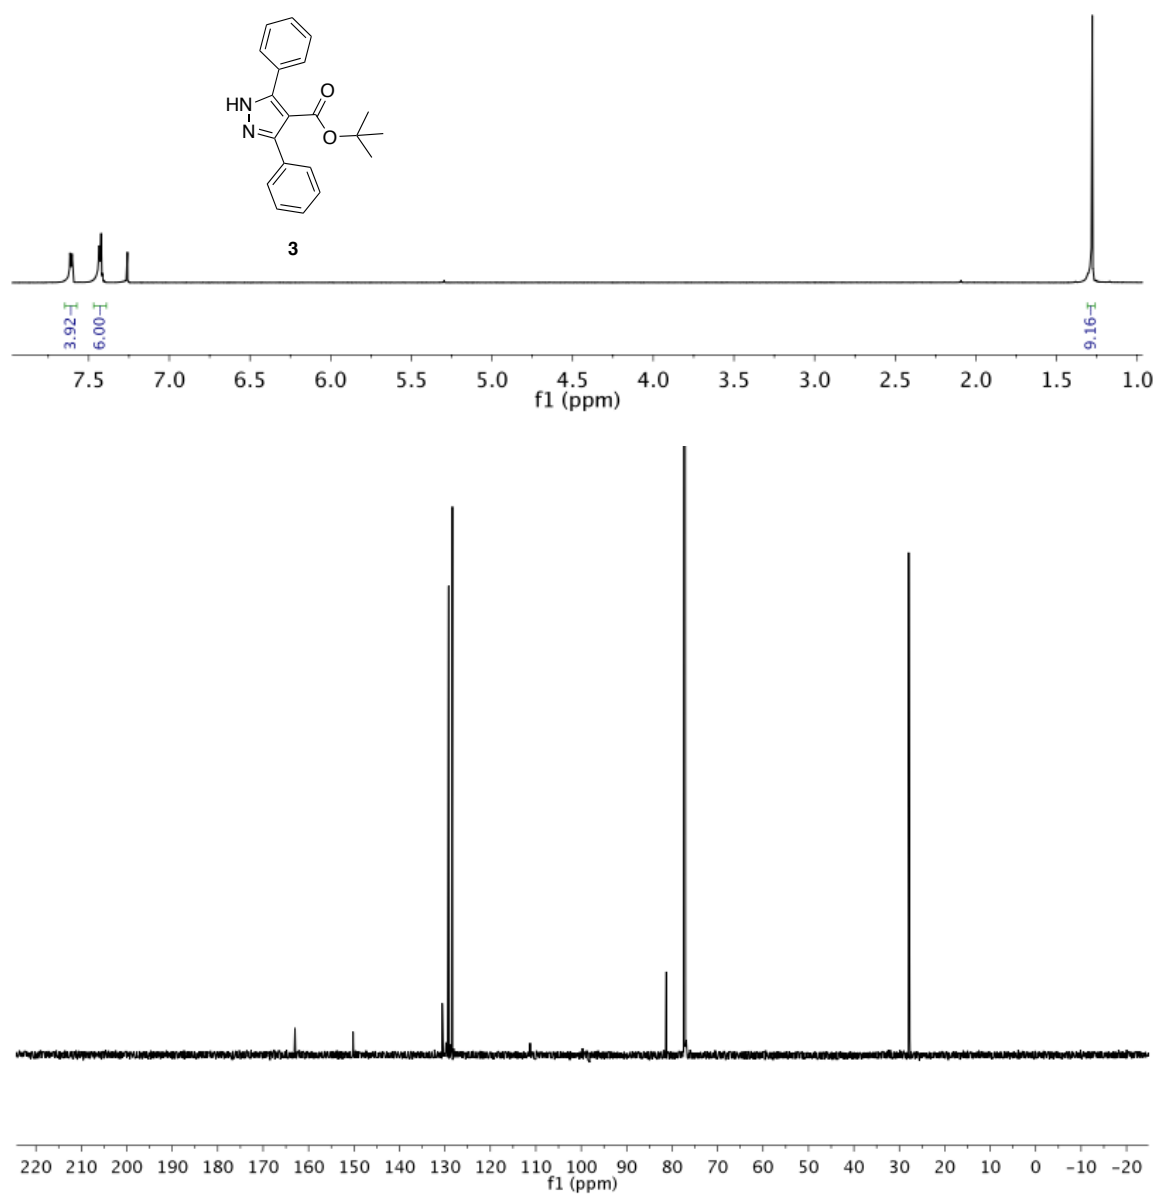

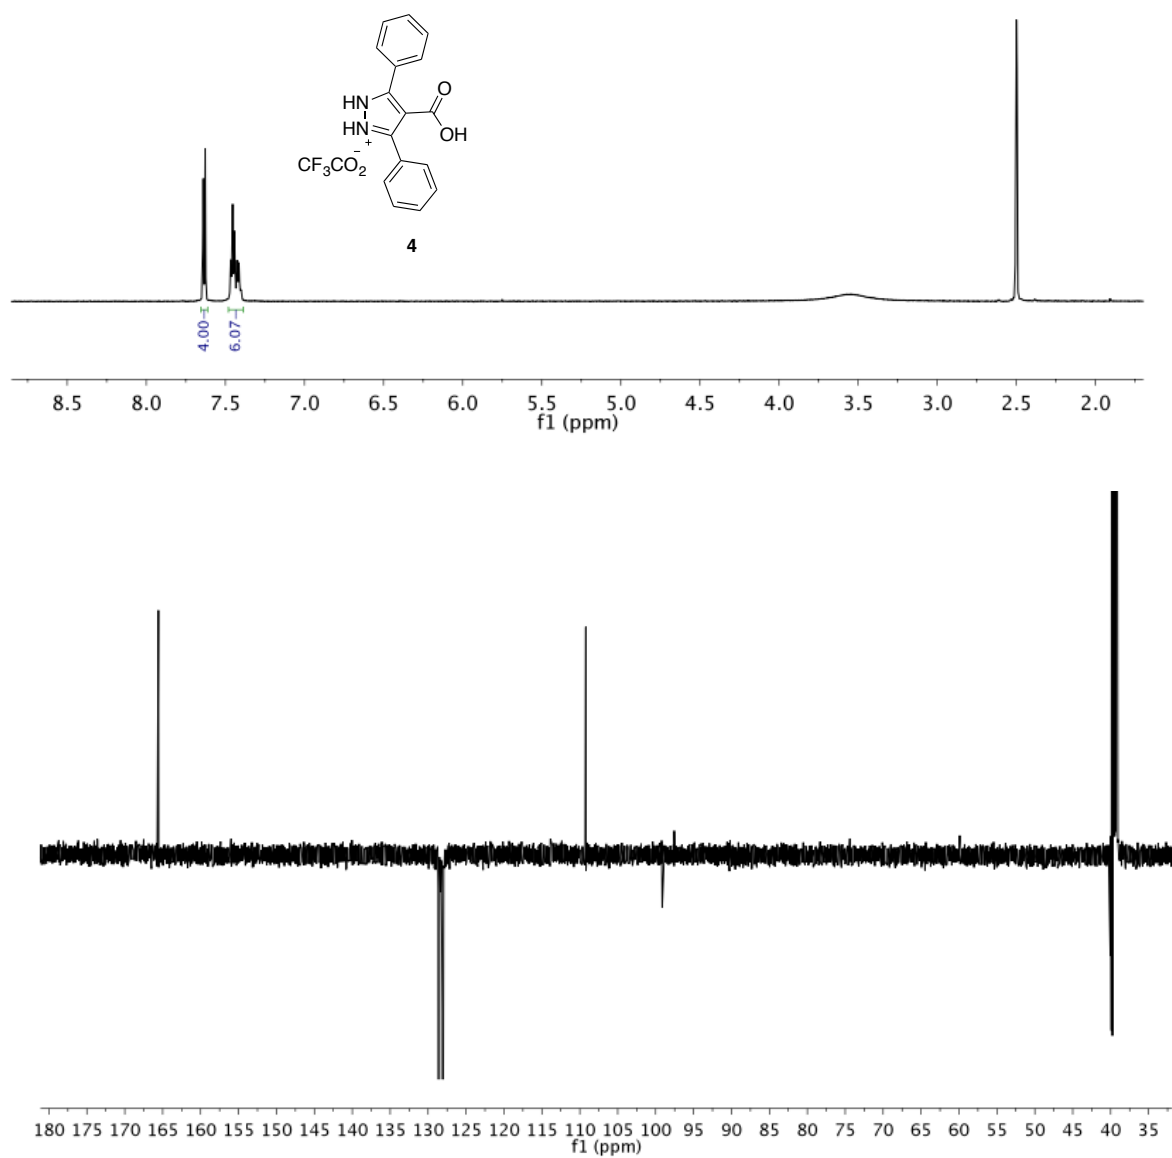

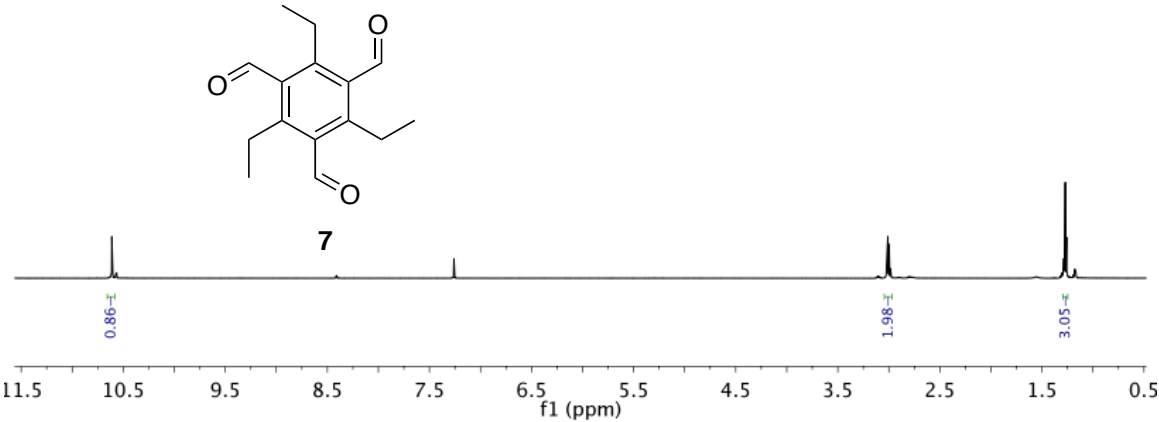

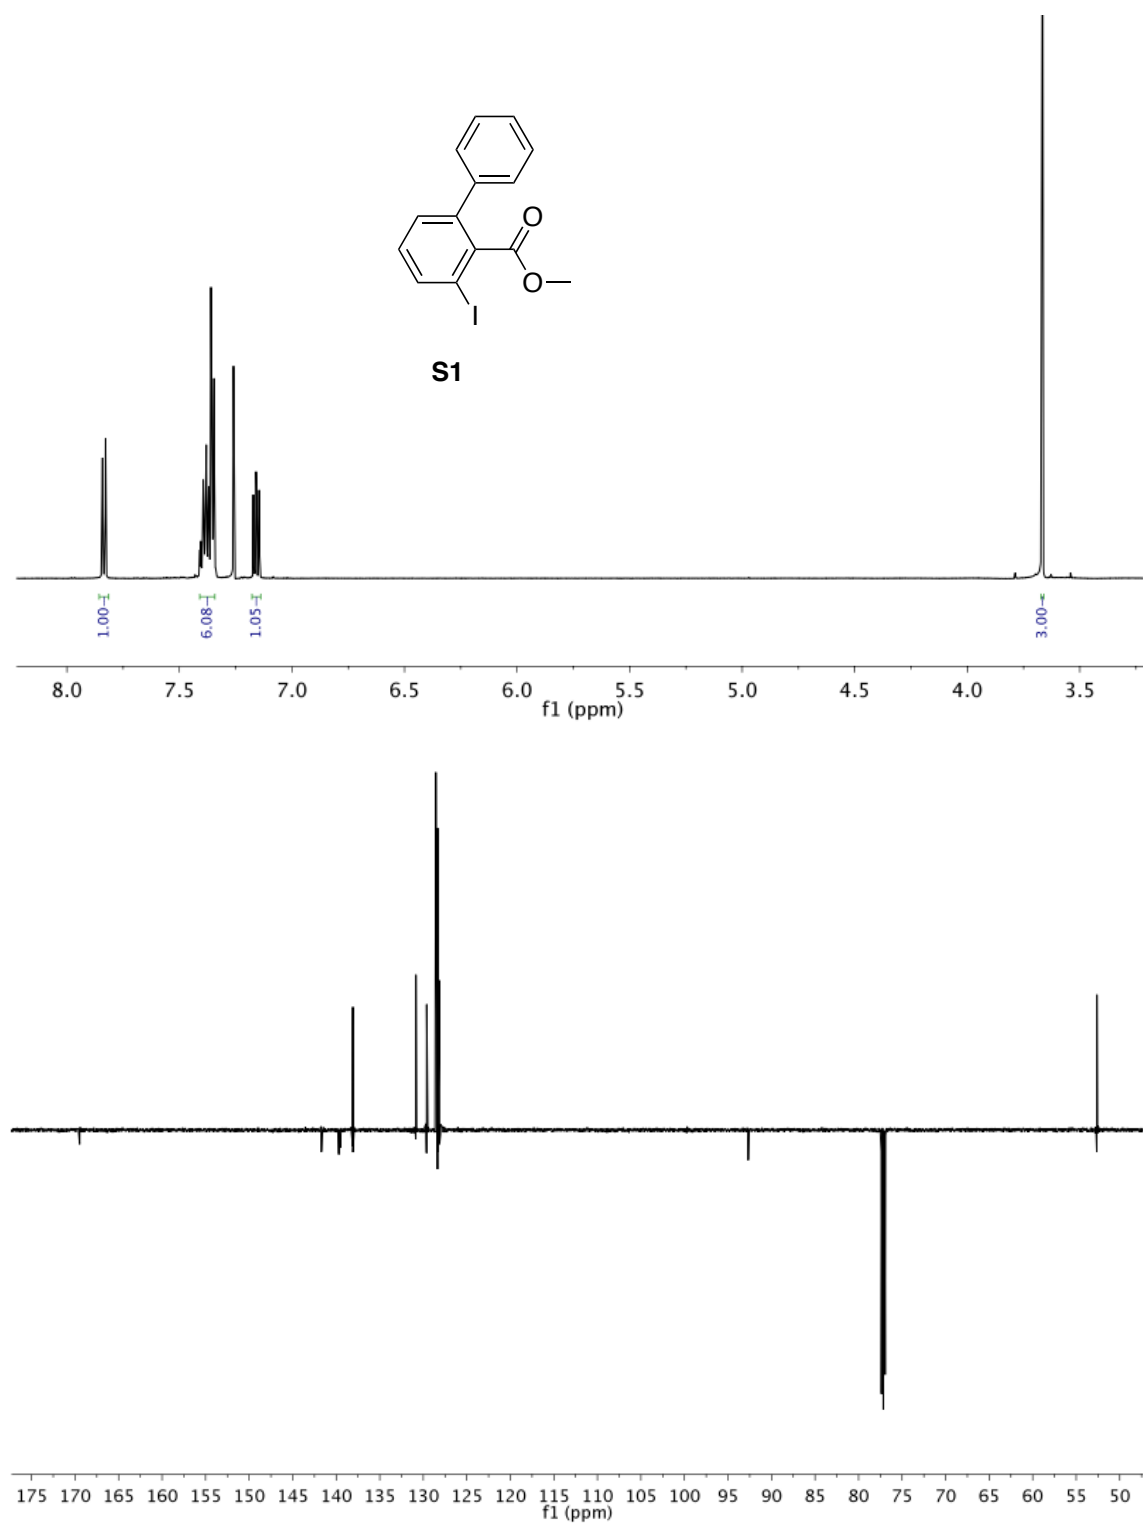



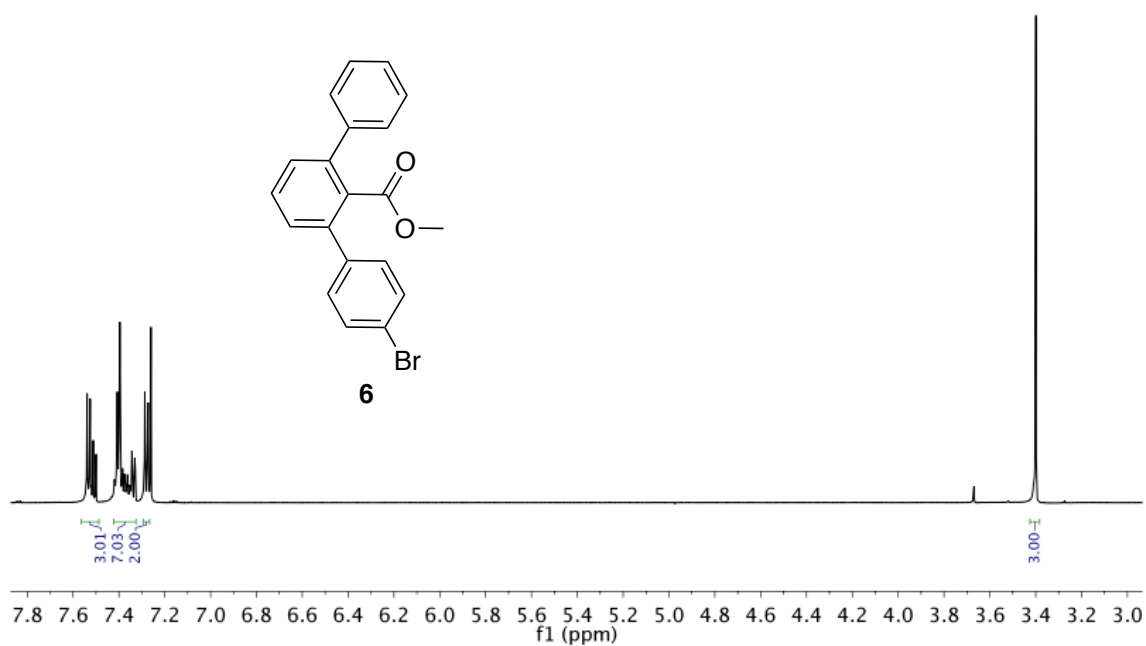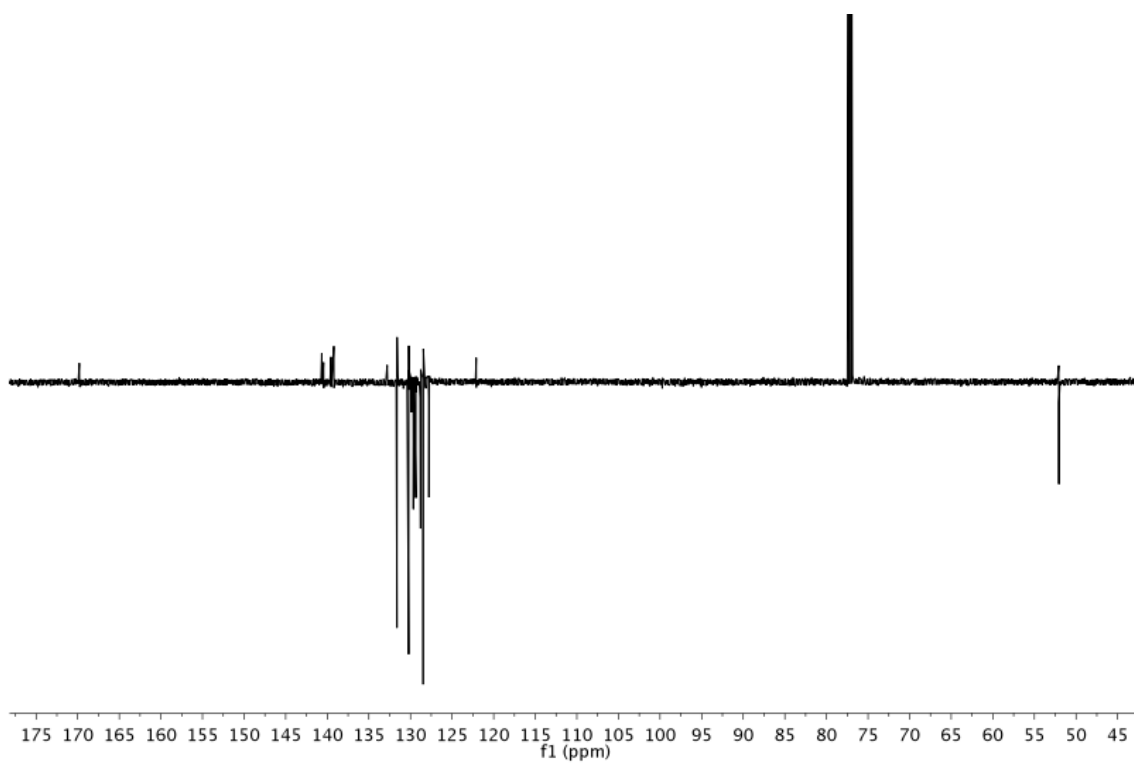

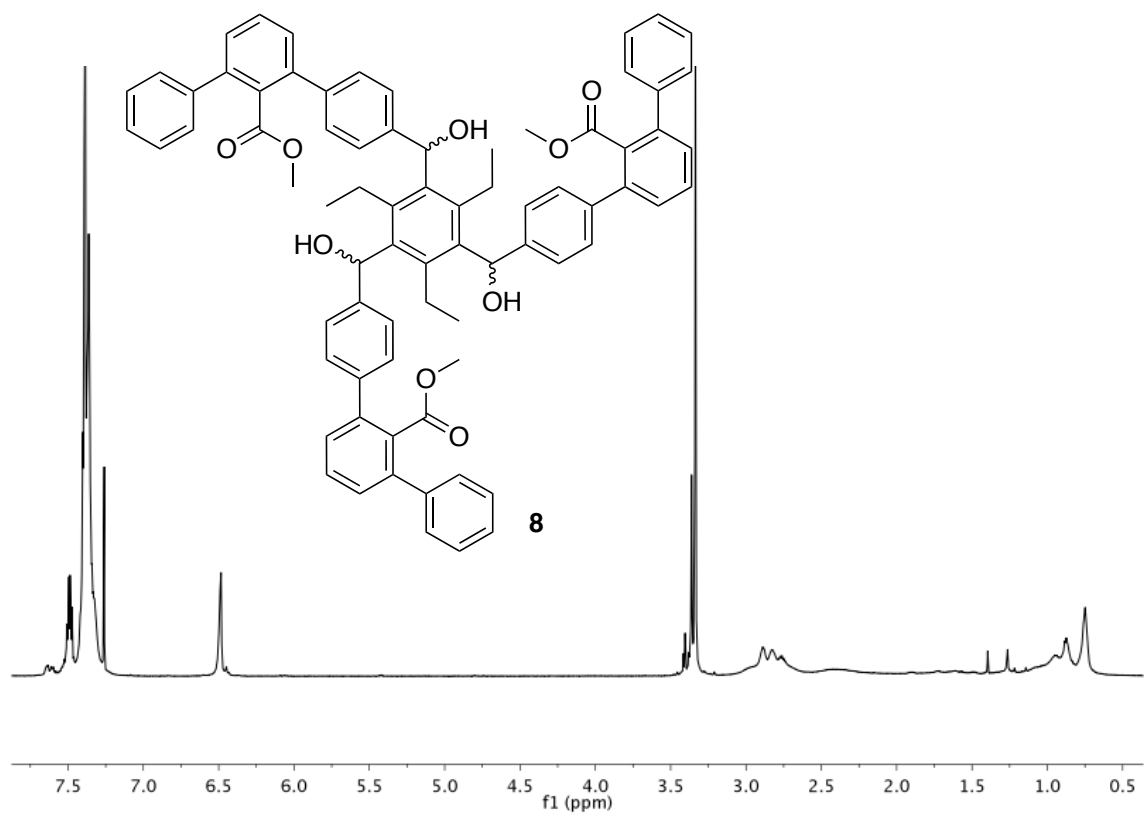

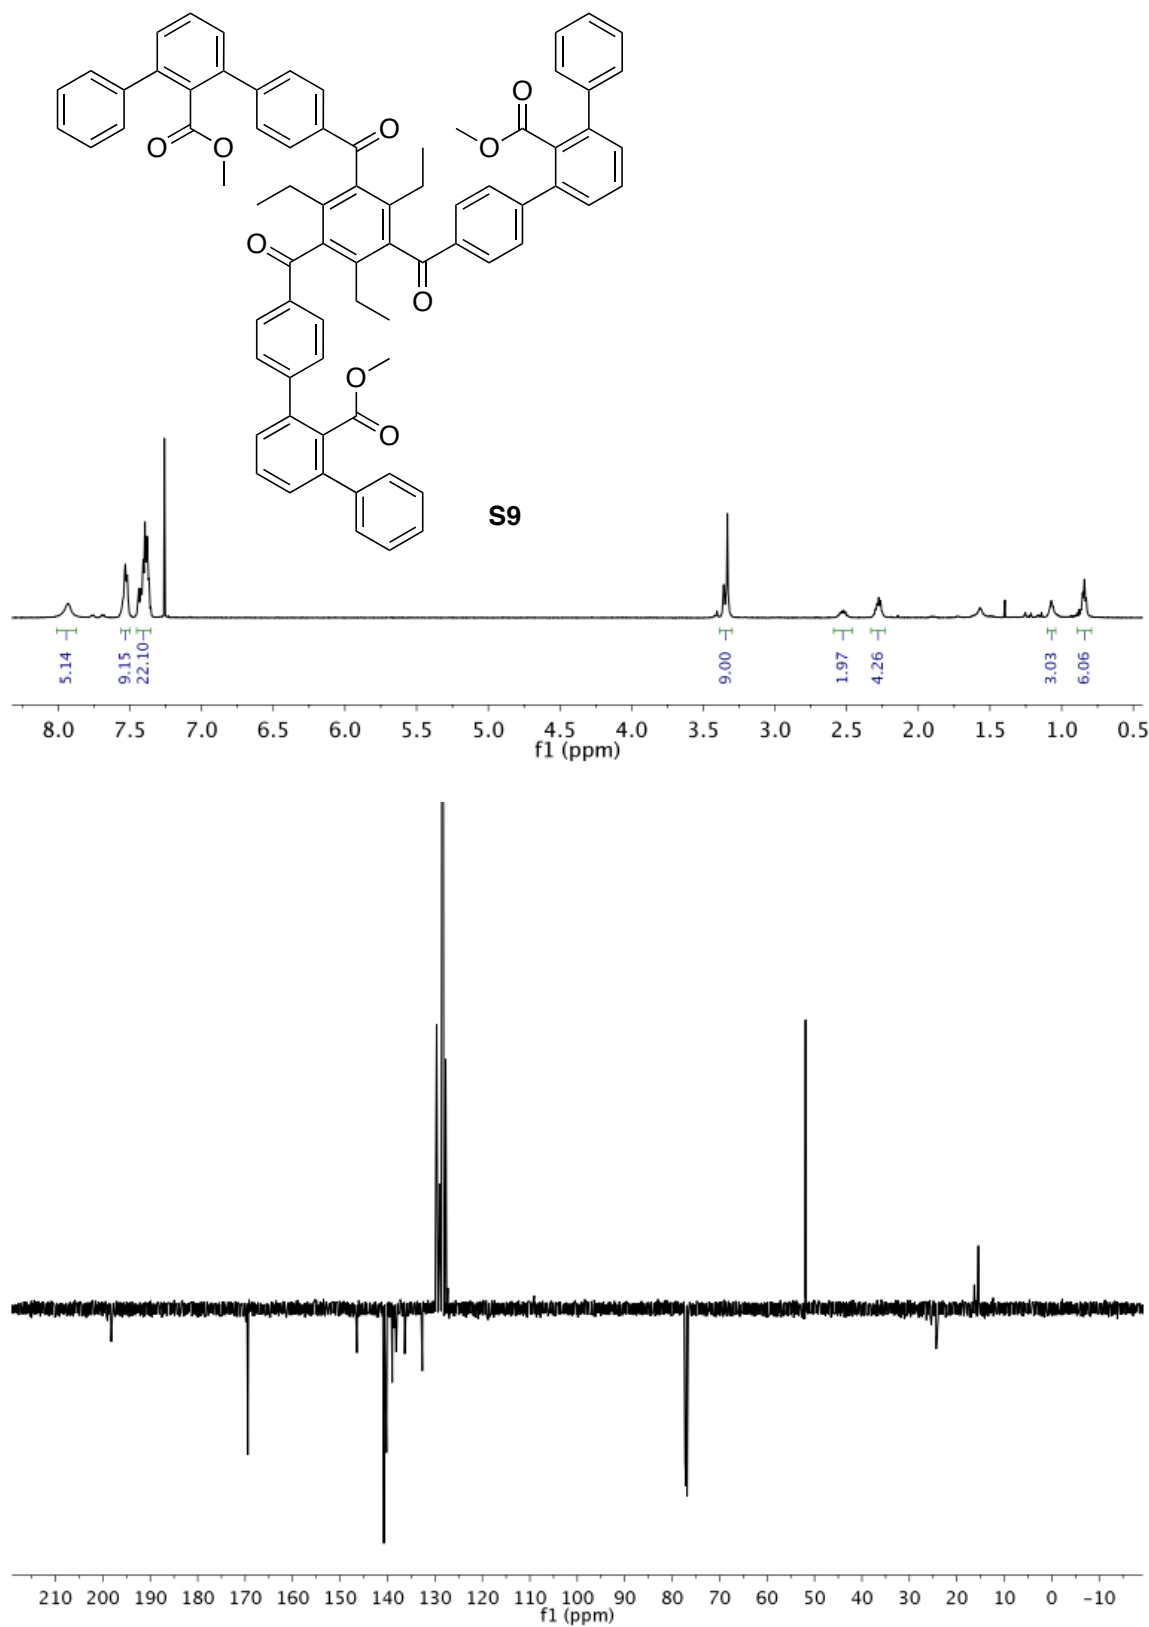

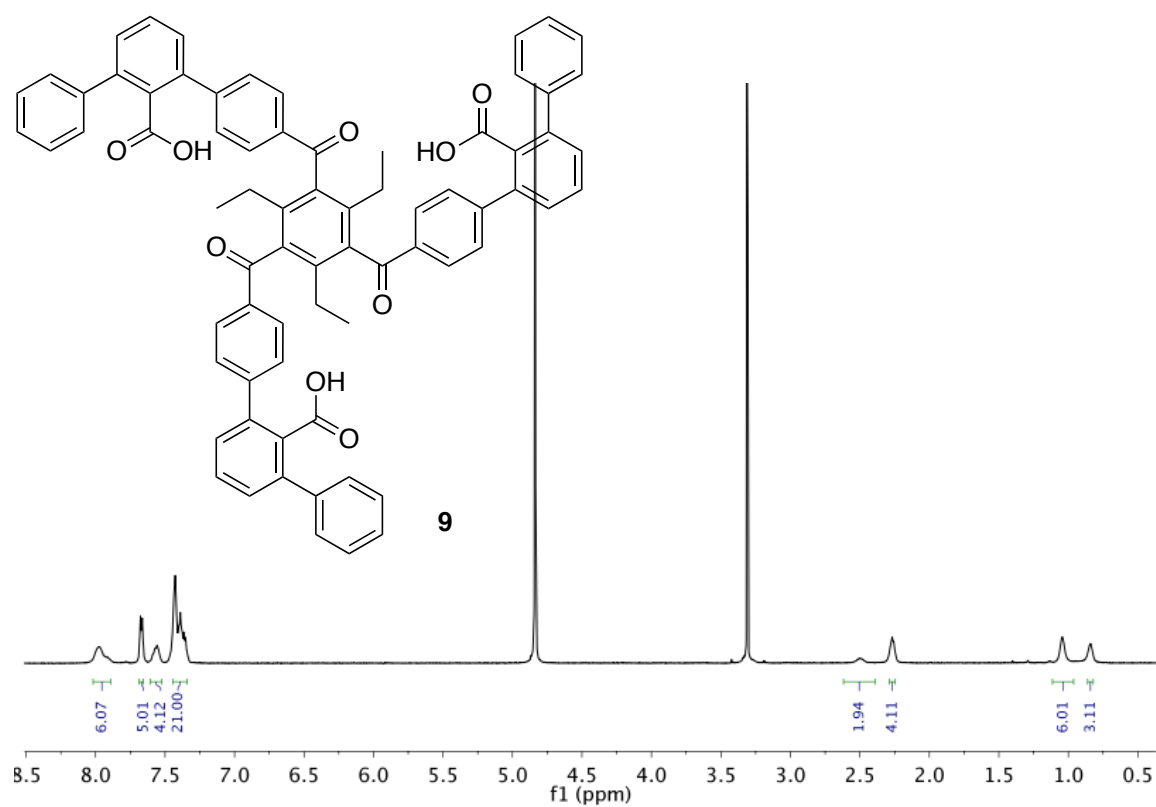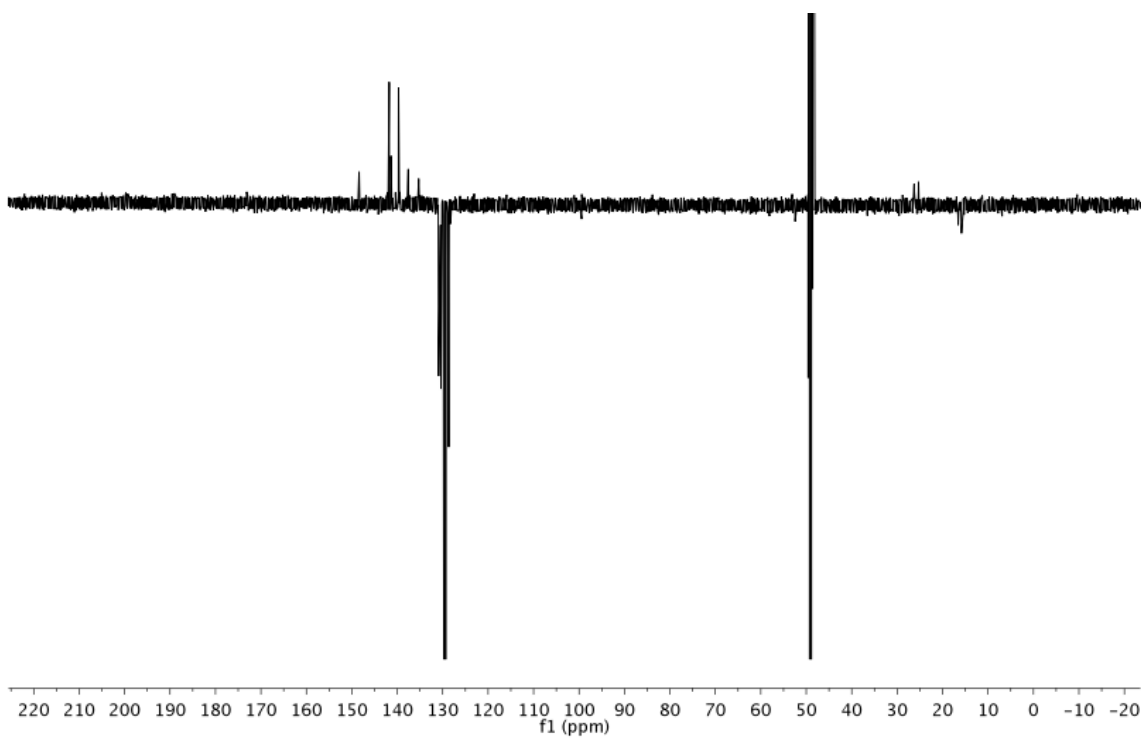

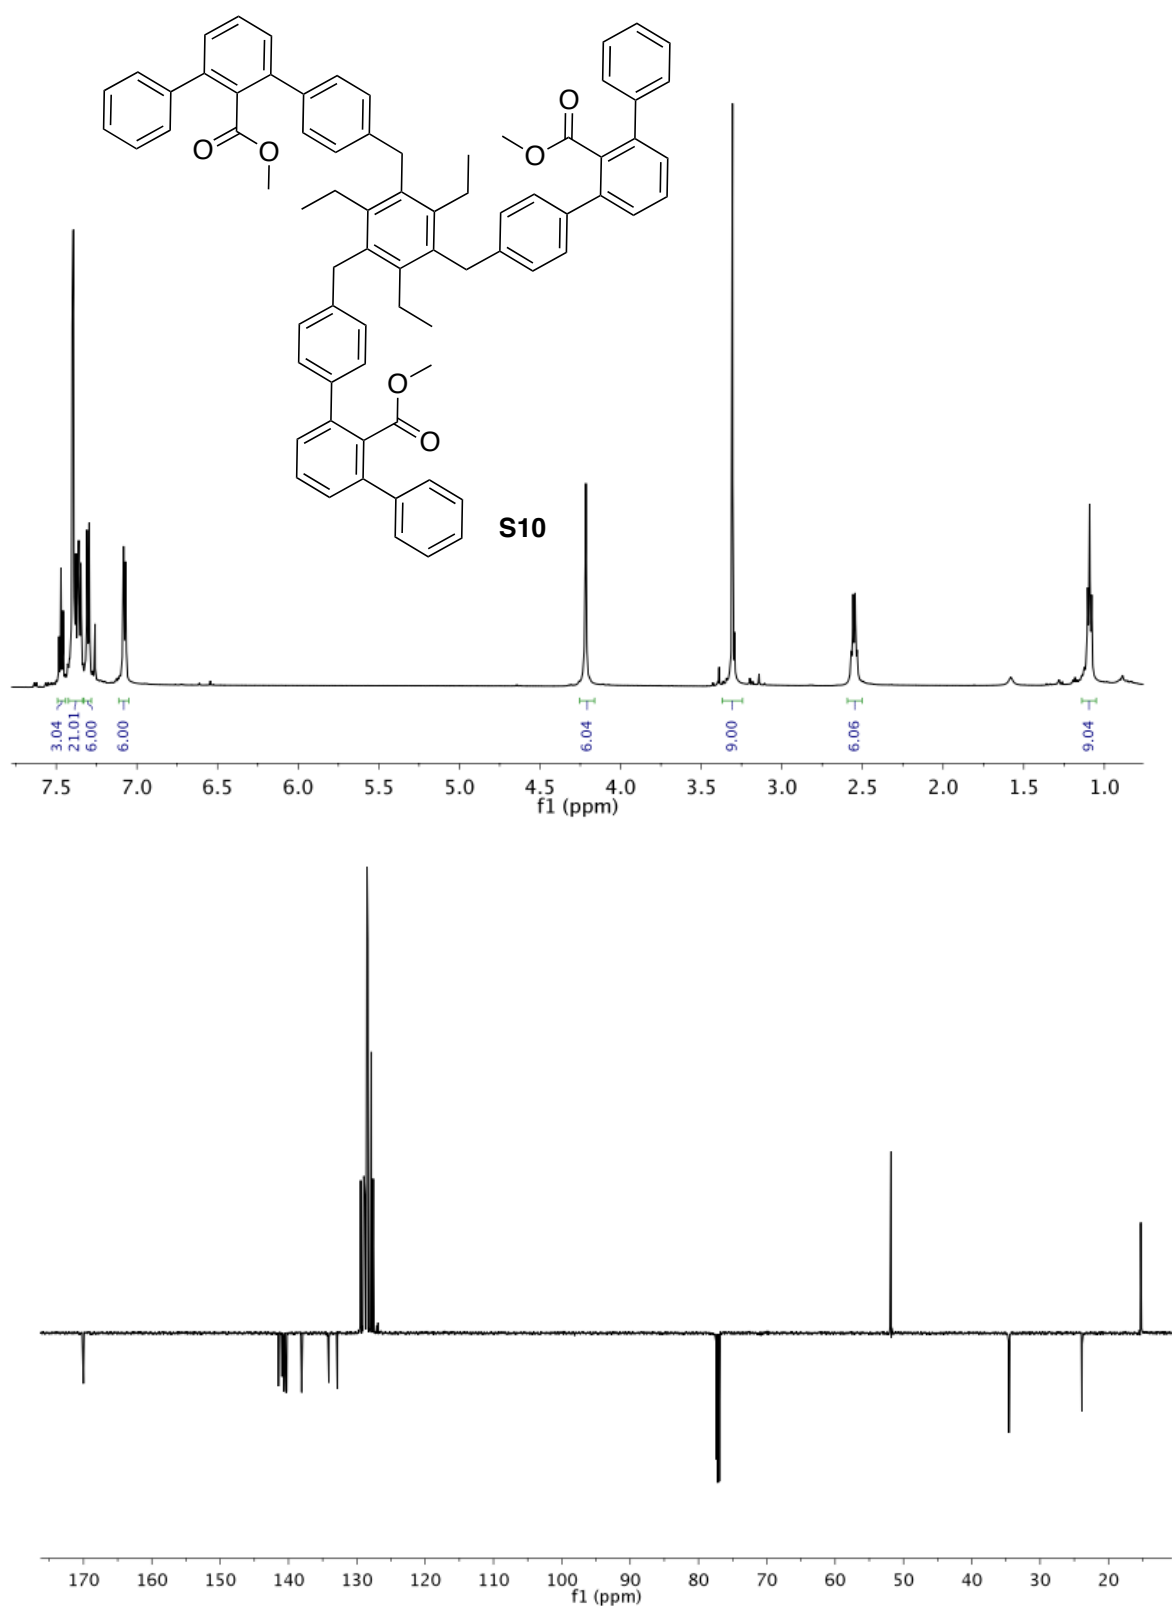

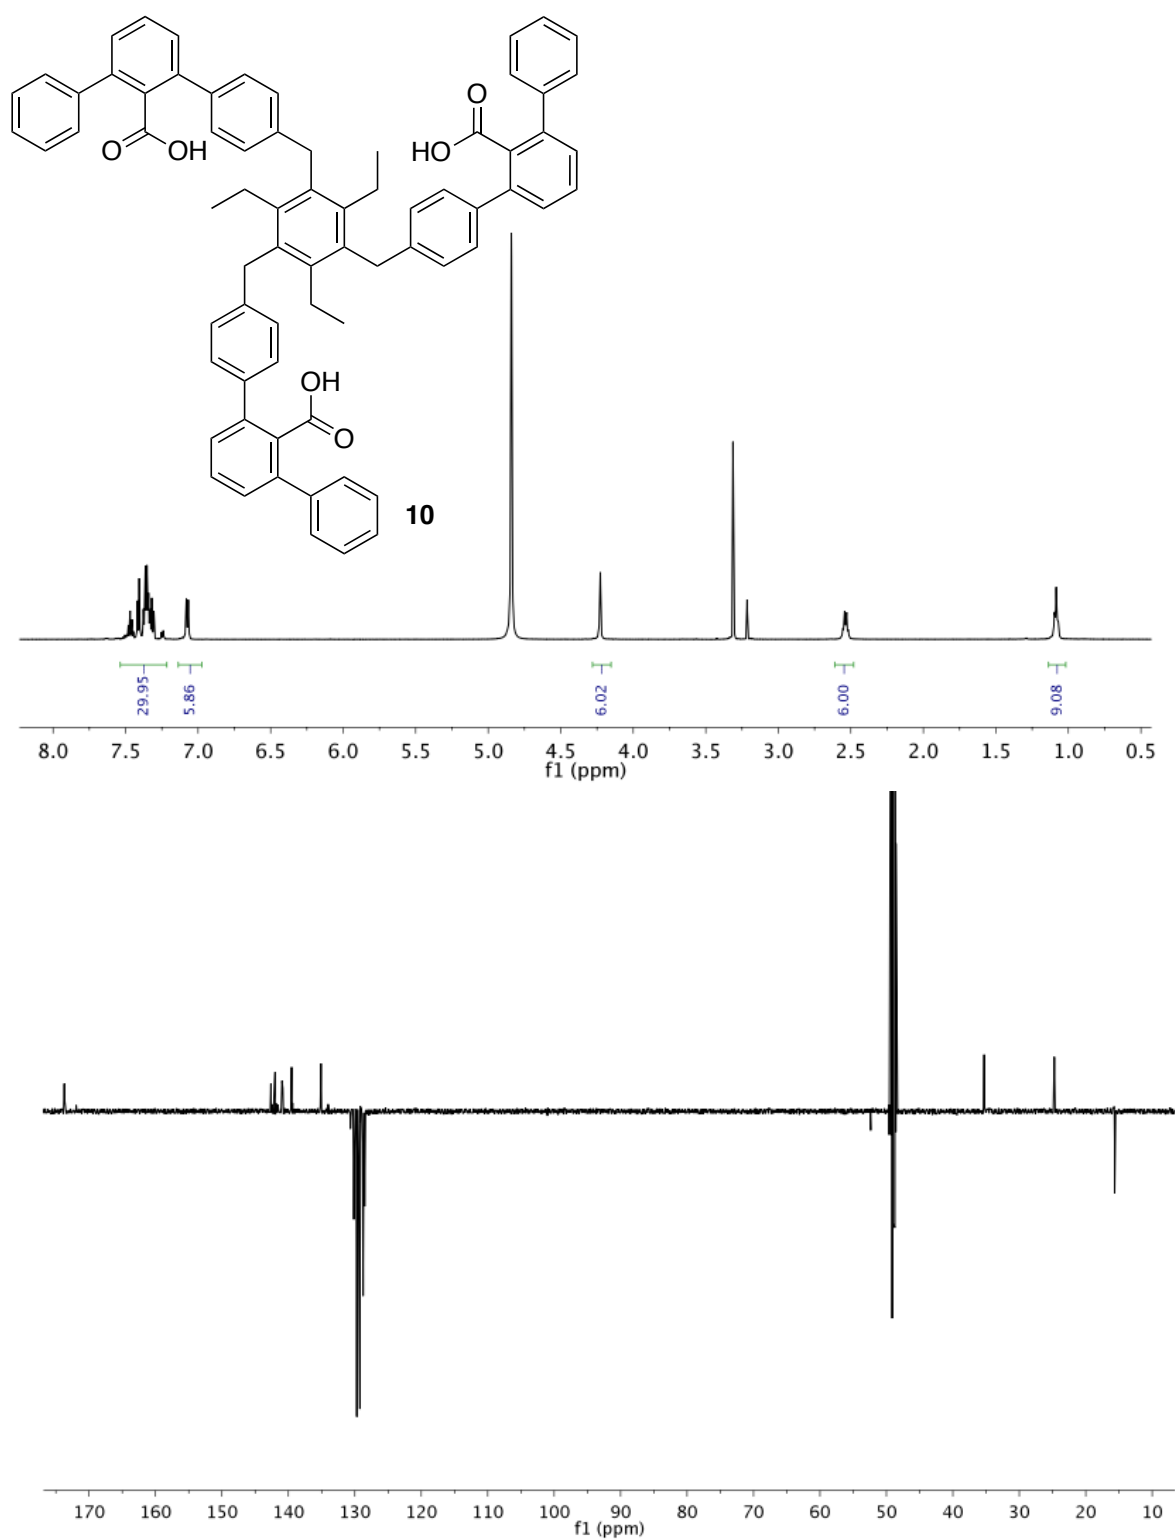

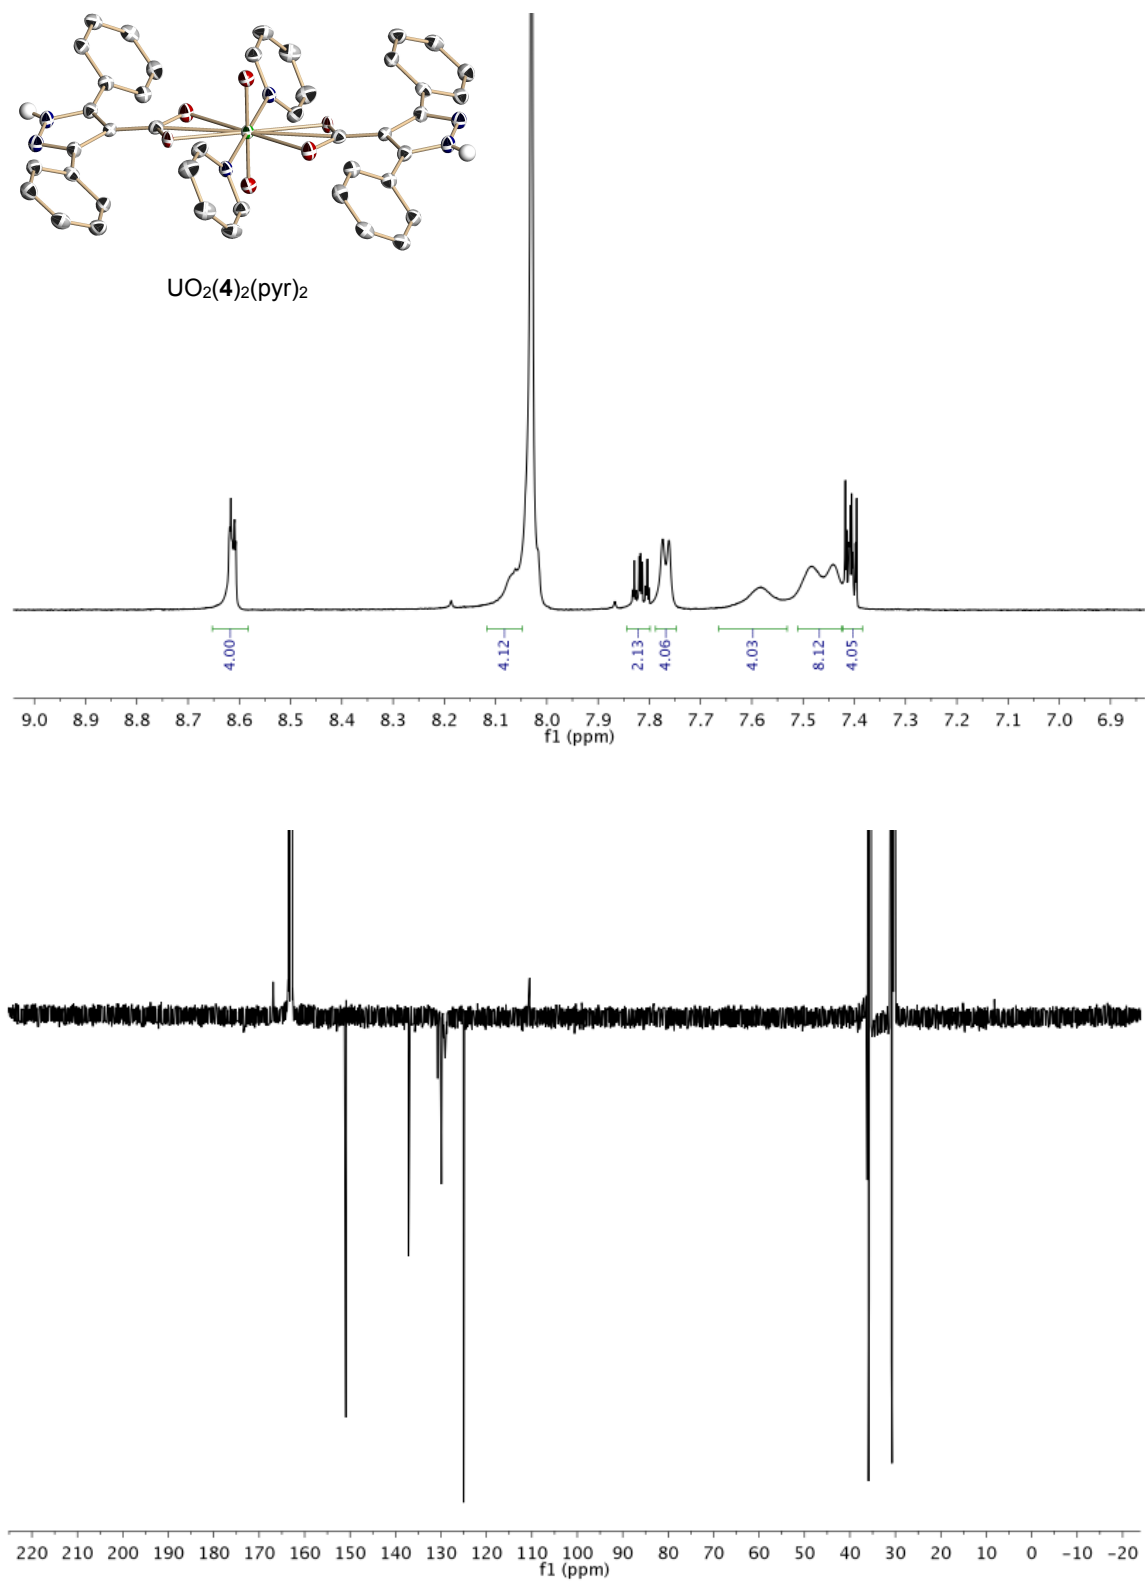

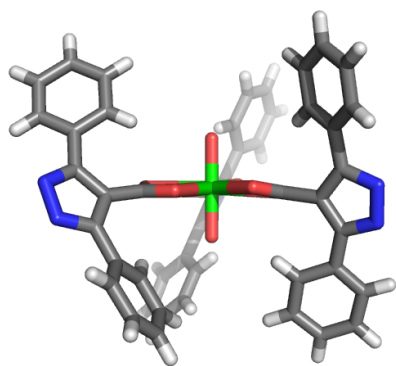

UO<sub>2</sub>(**4**)<sub>3</sub>·Et<sub>3</sub>NH

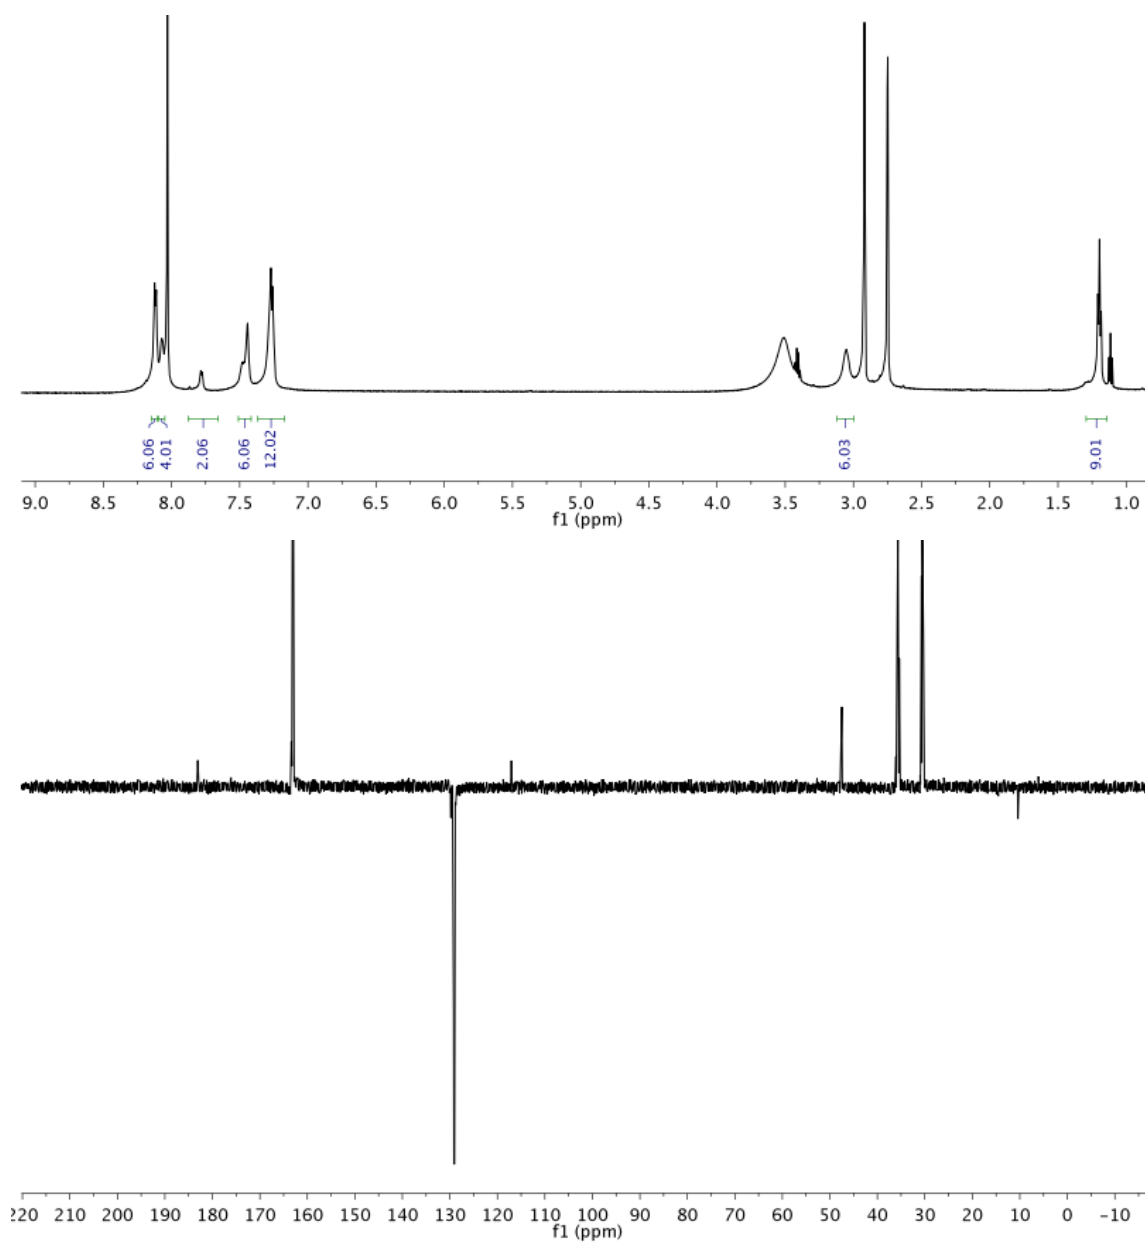



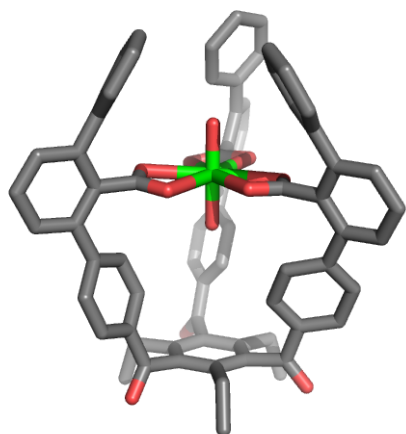

UO<sub>2</sub>(**9**)·Et<sub>3</sub>NH

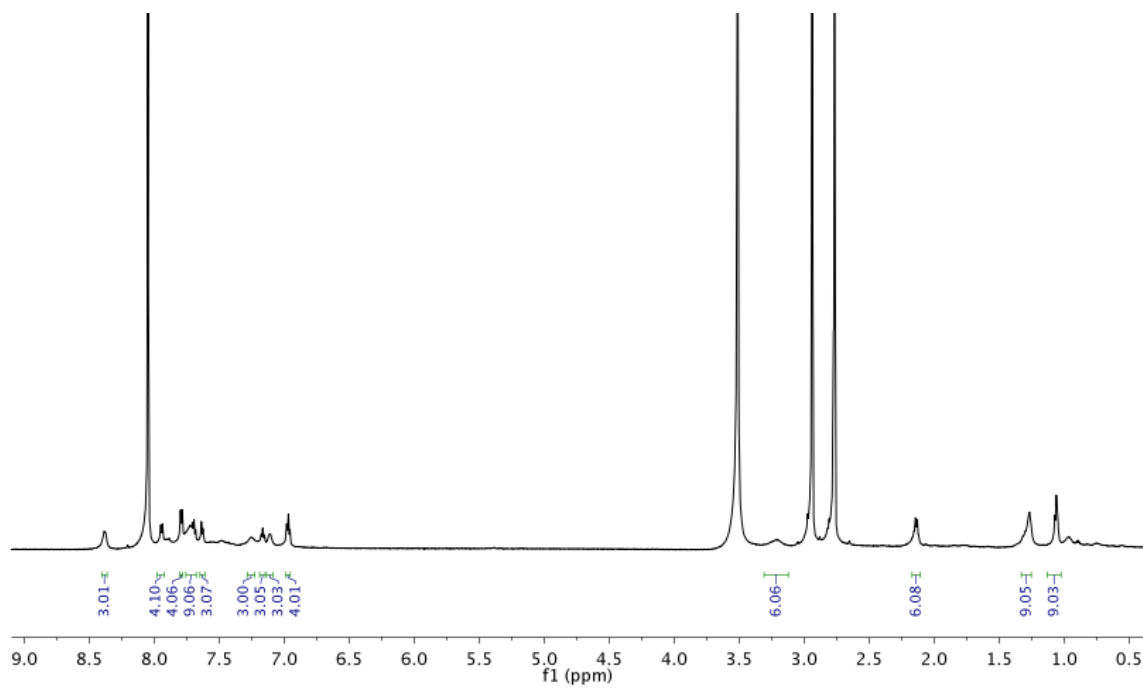

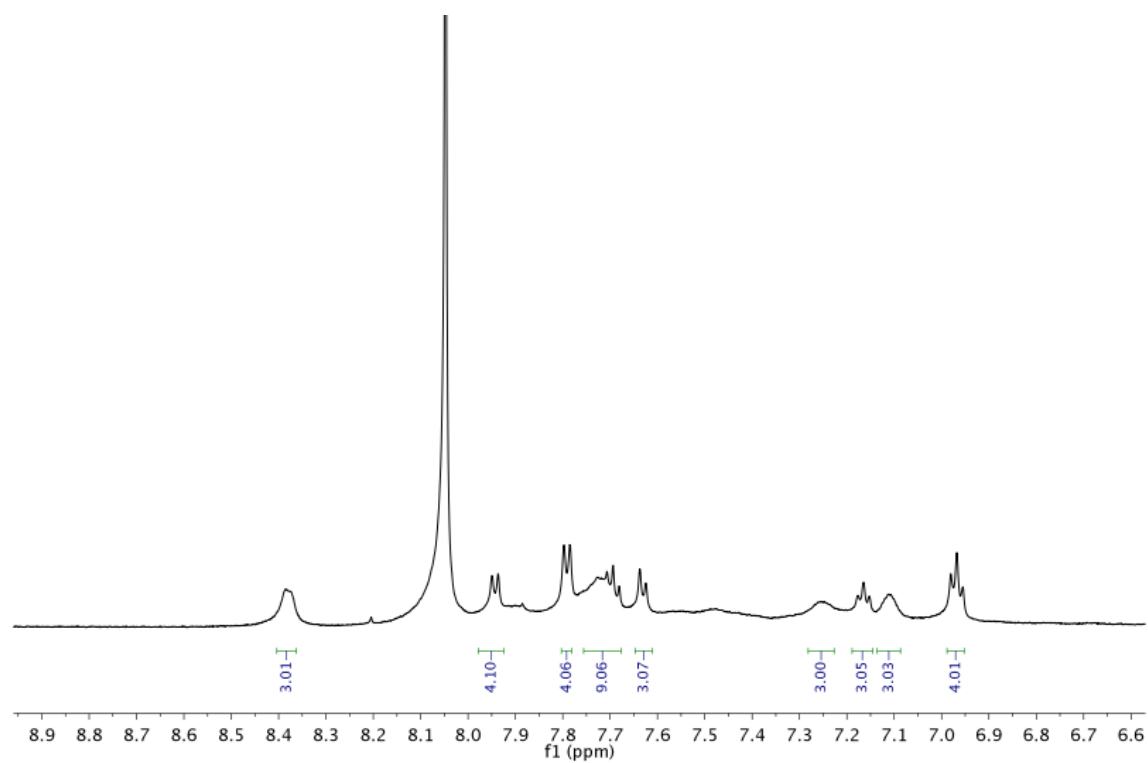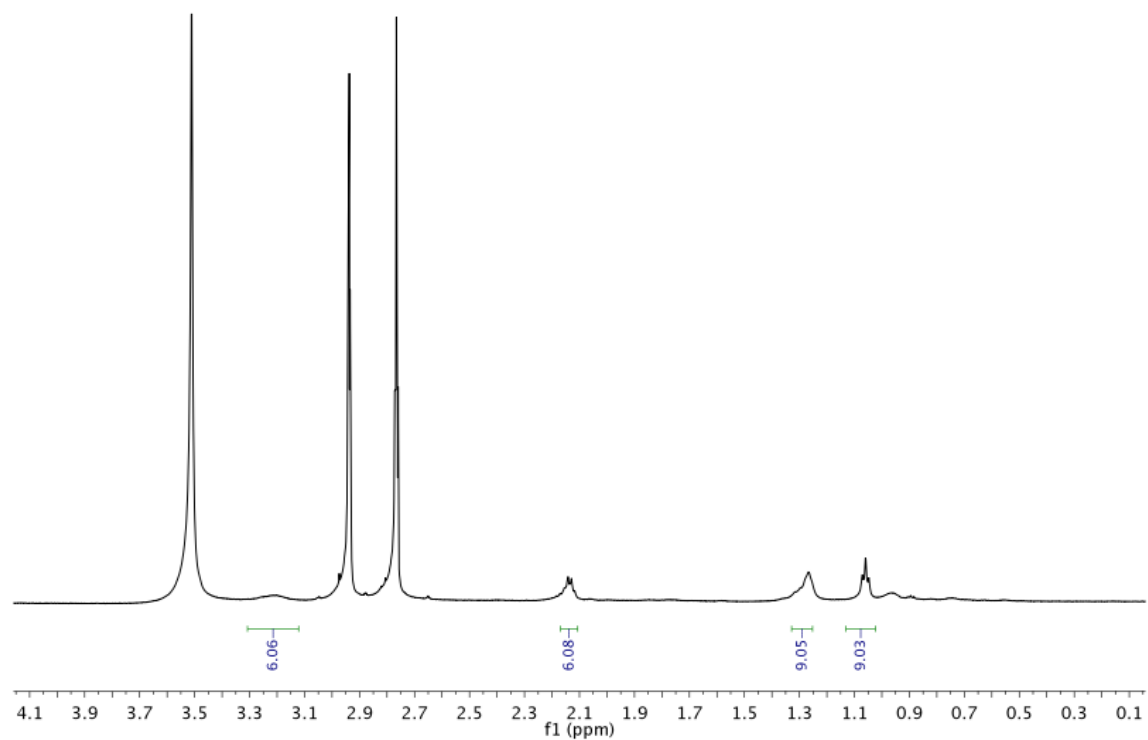

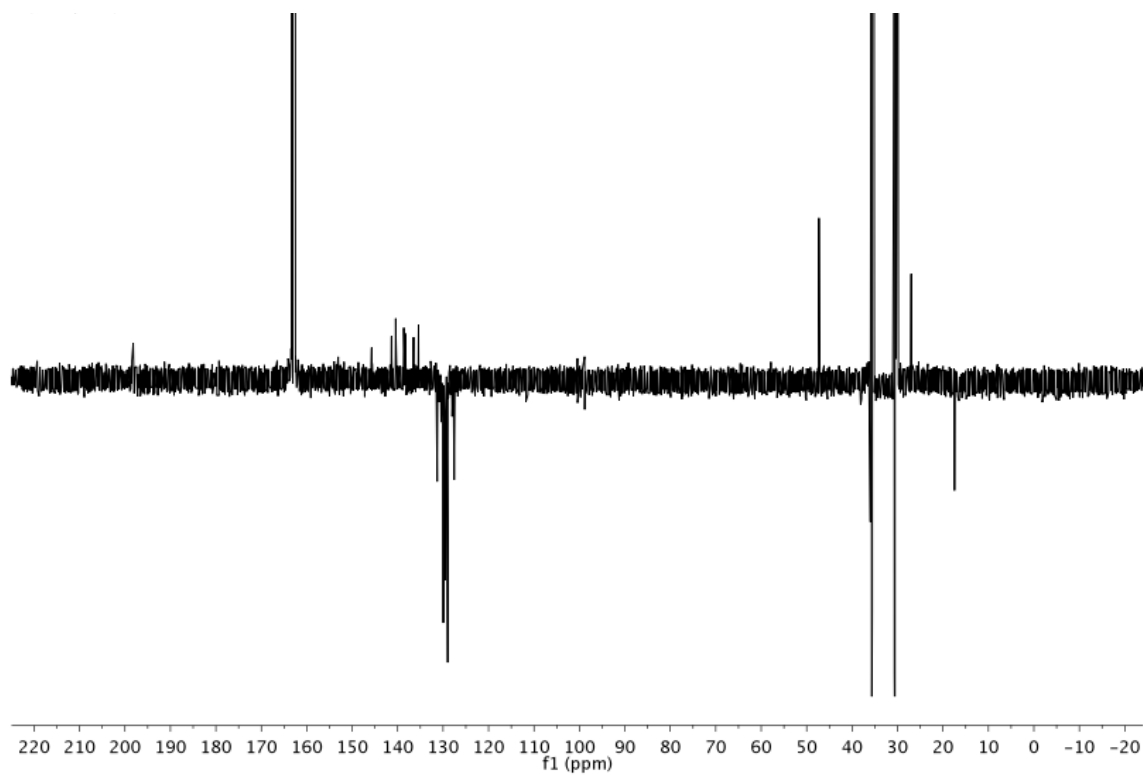

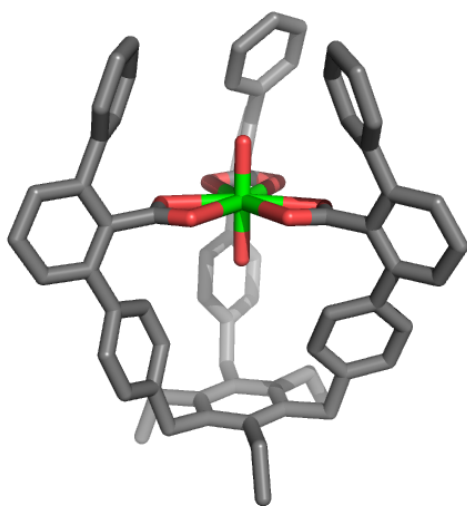

UO<sub>2</sub>(**10**)·Et<sub>3</sub>NH

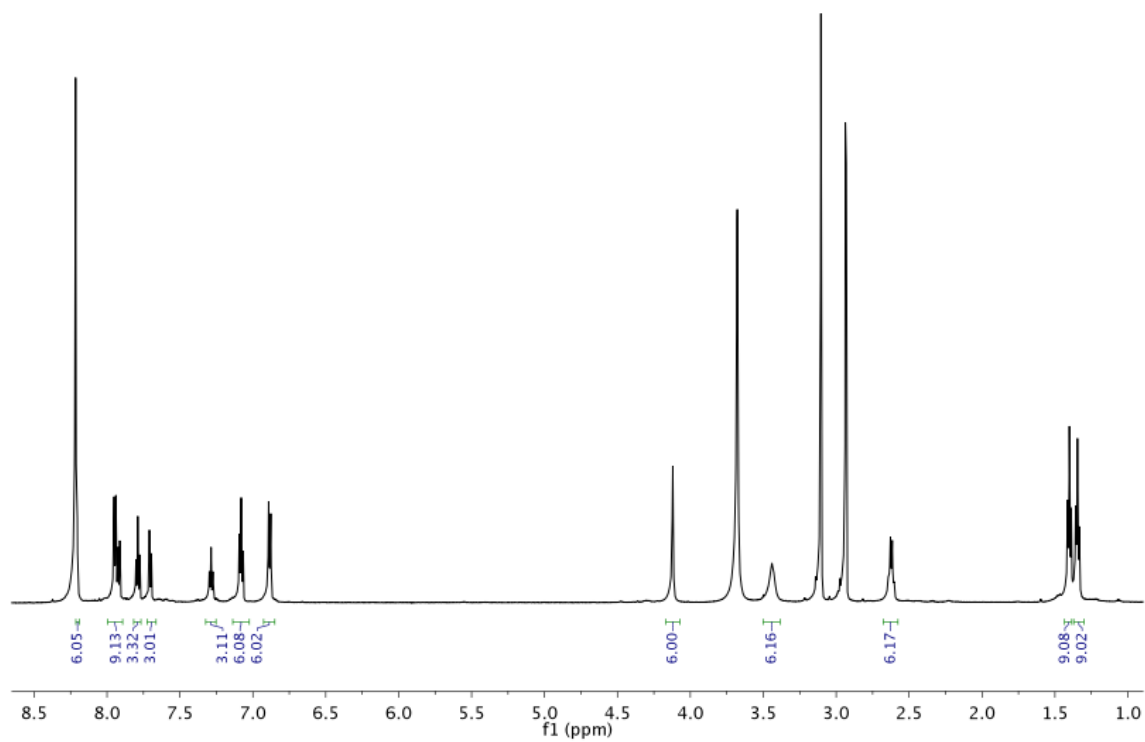

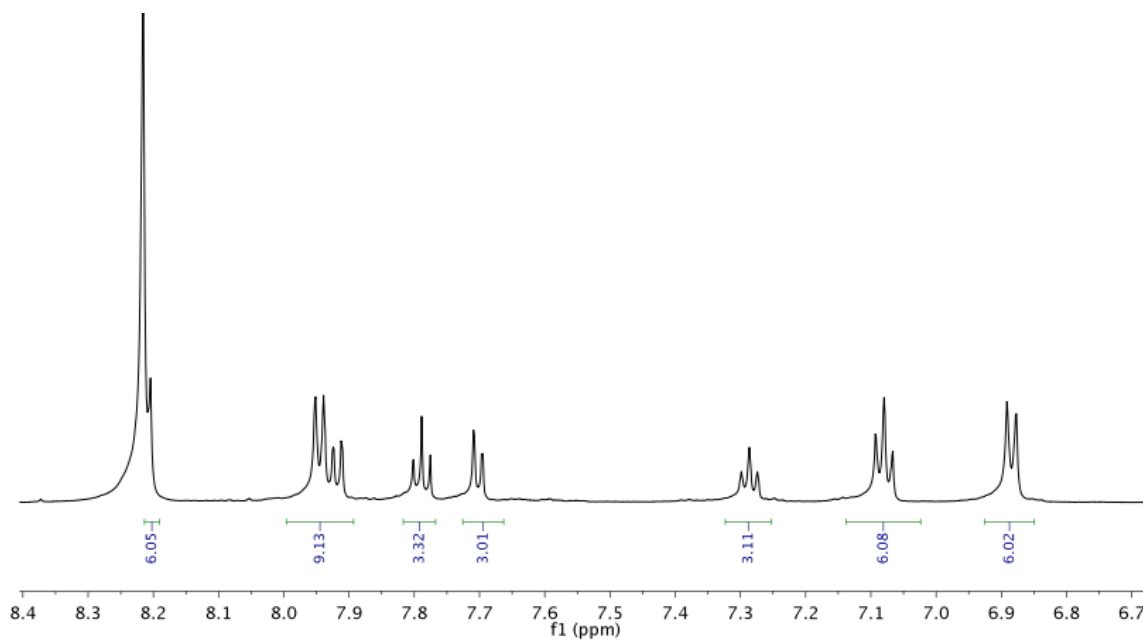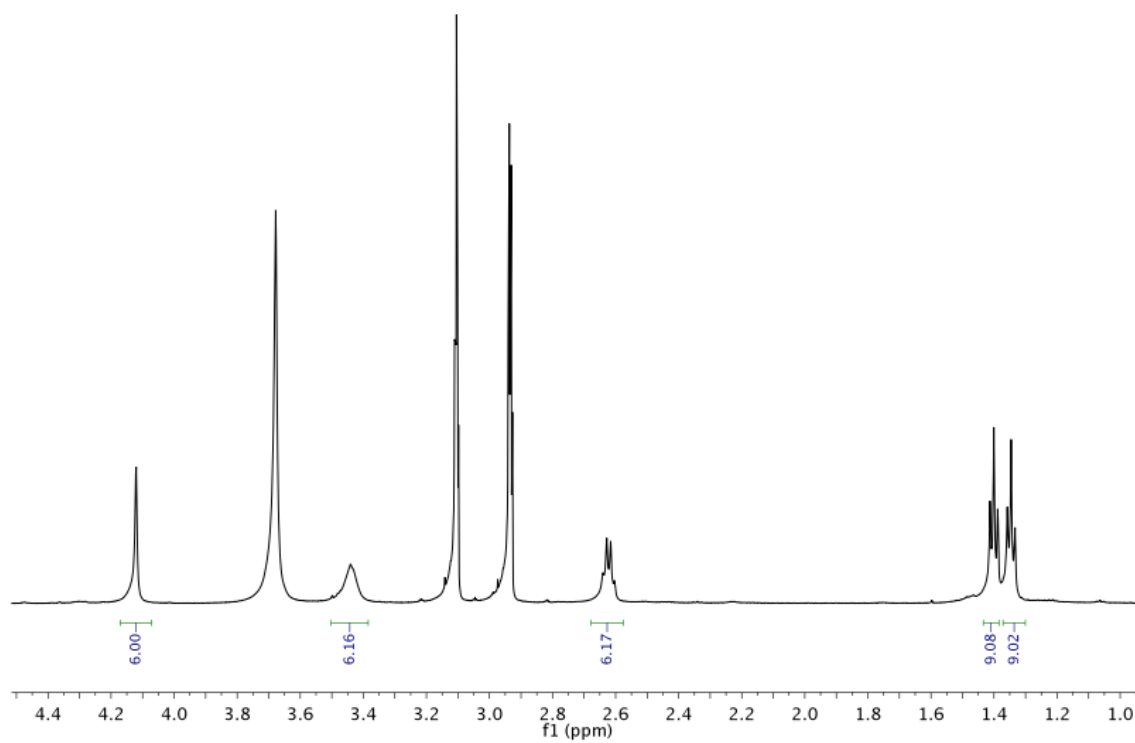

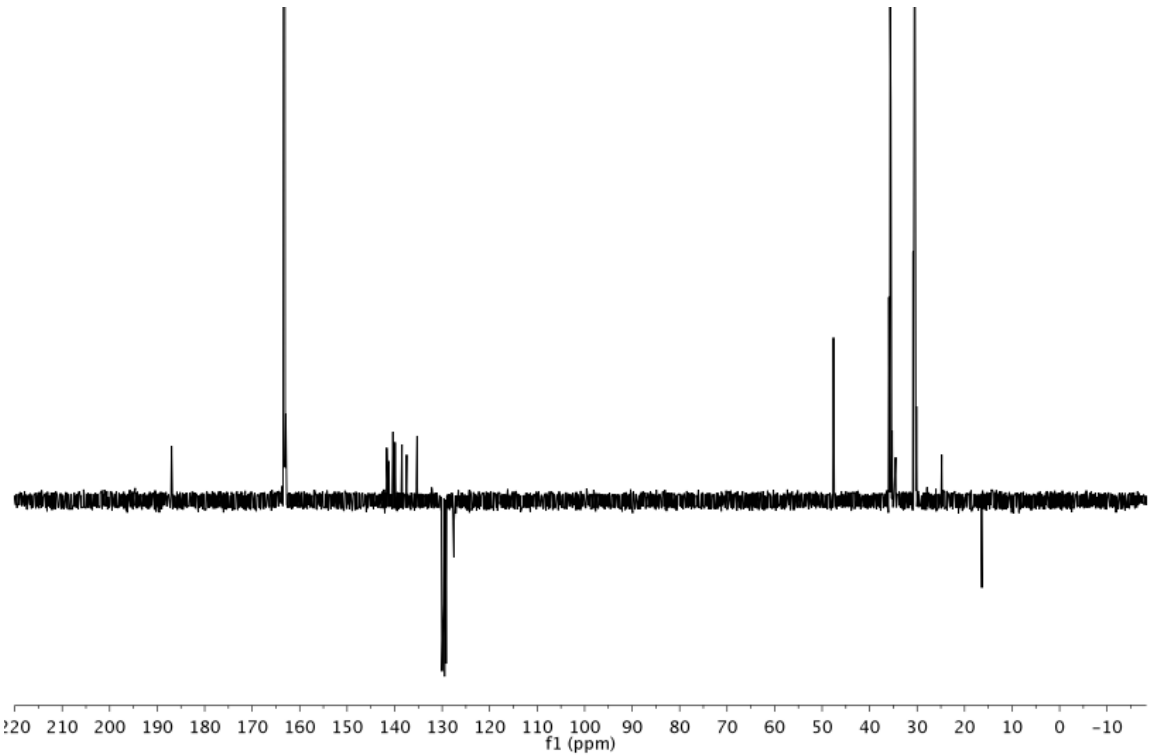

**Variable Temperature  $^1\text{H}$  NMR for  $\text{UO}_2(9)\cdot\text{Et}_3\text{NH}$**

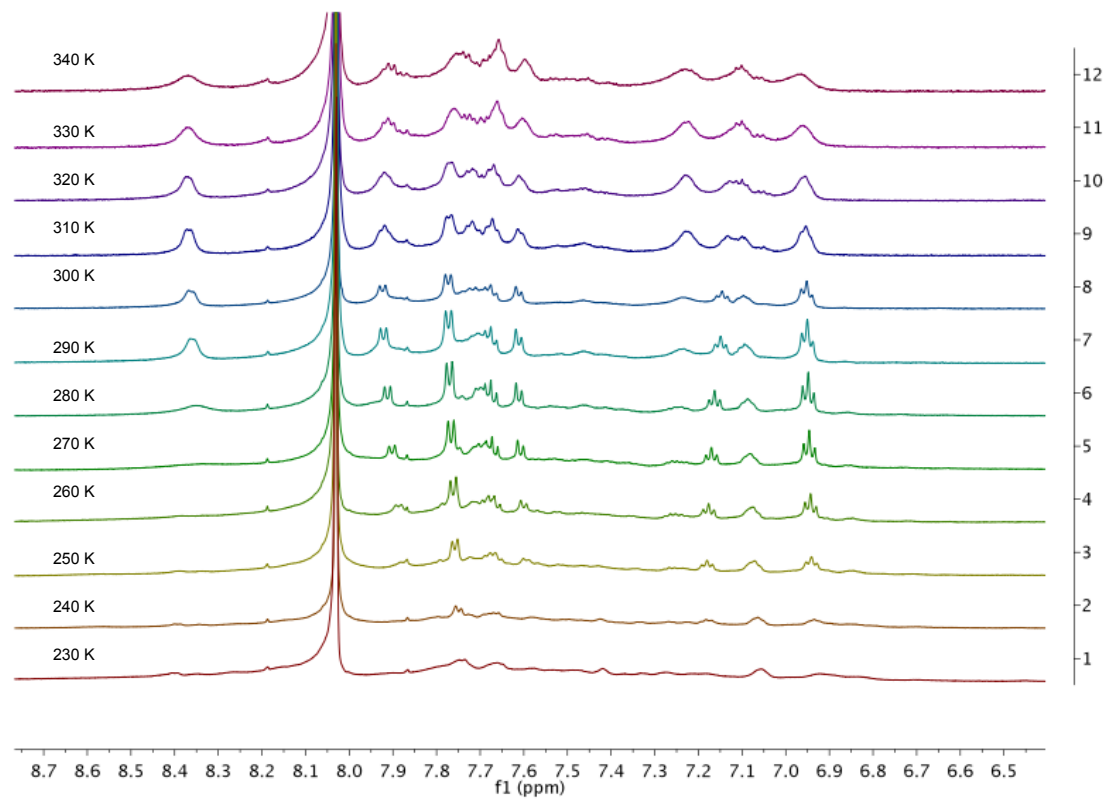

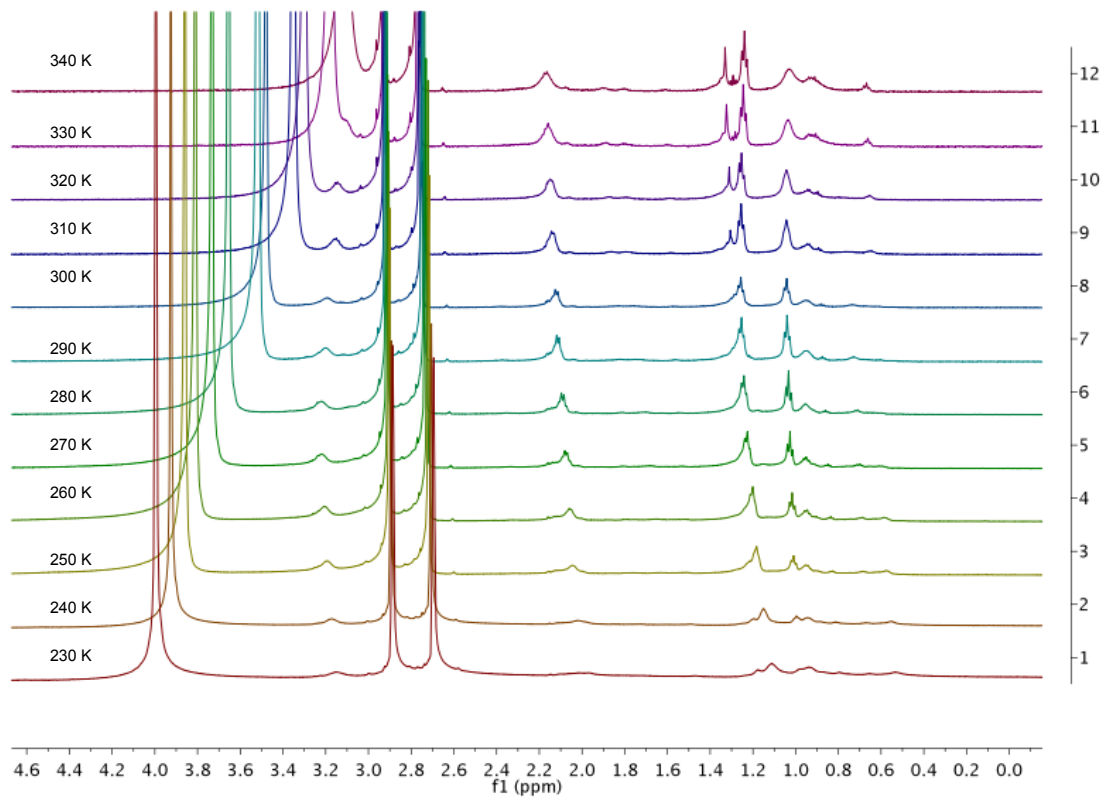



IR Spectra

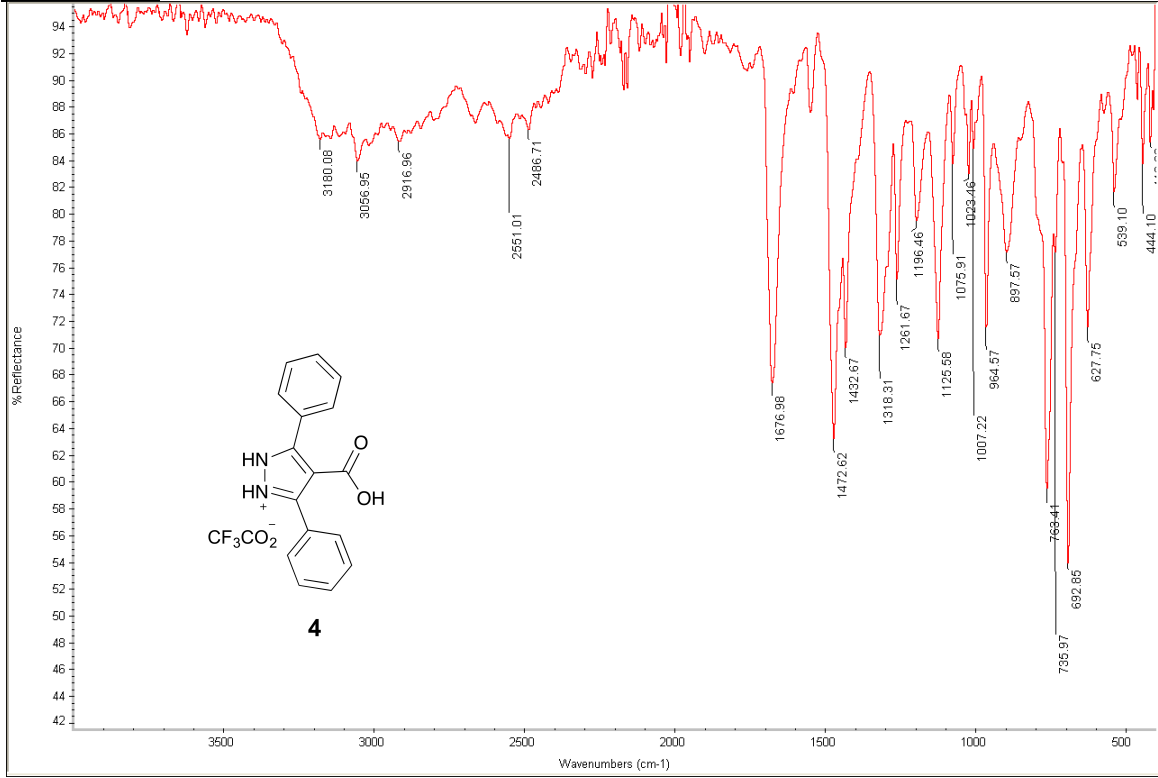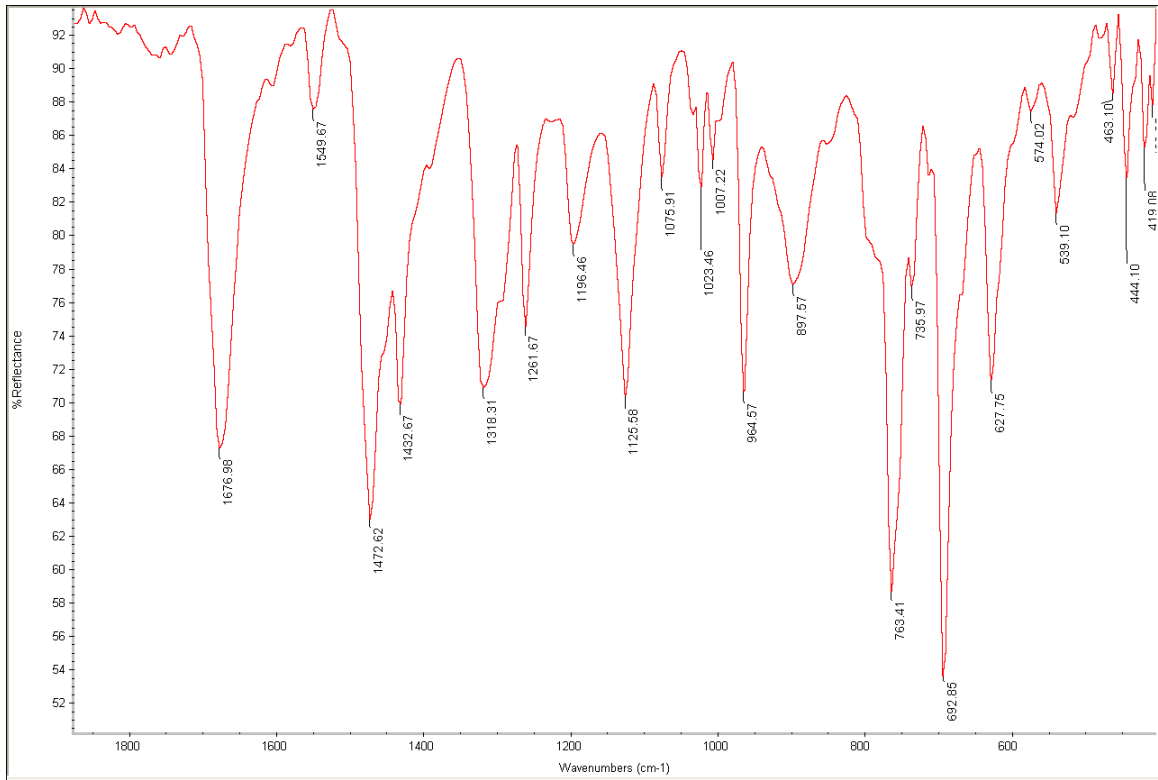

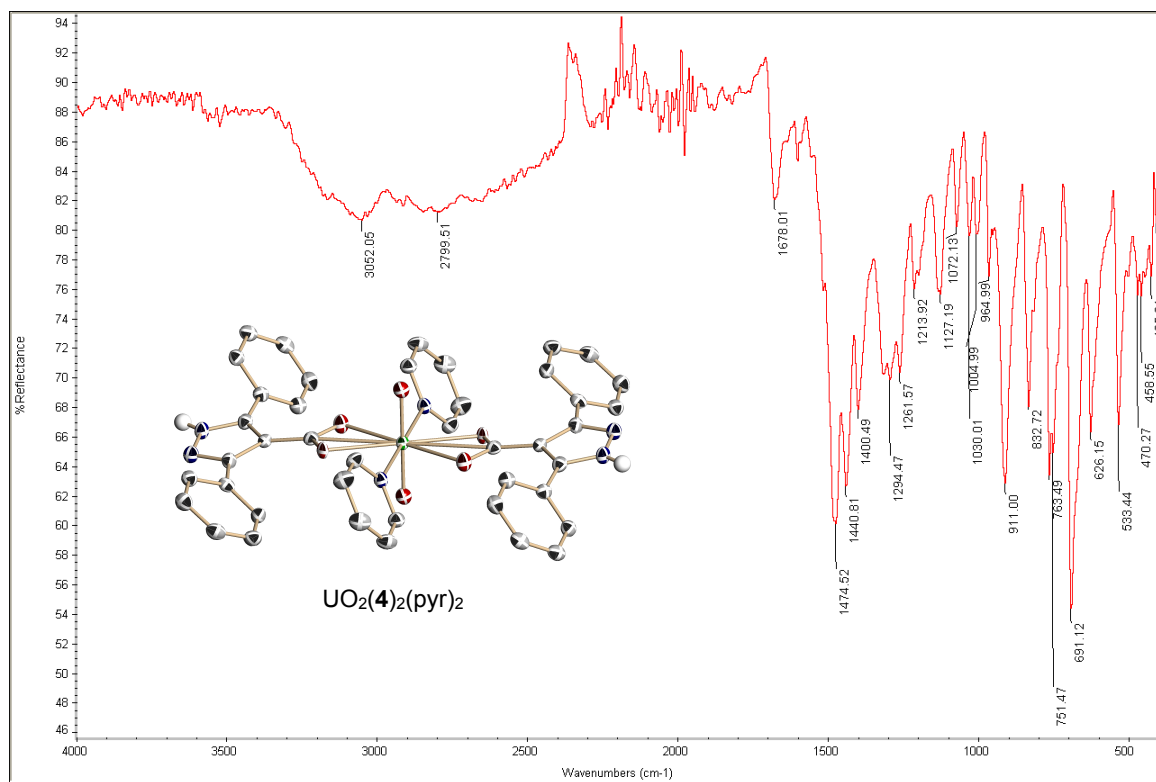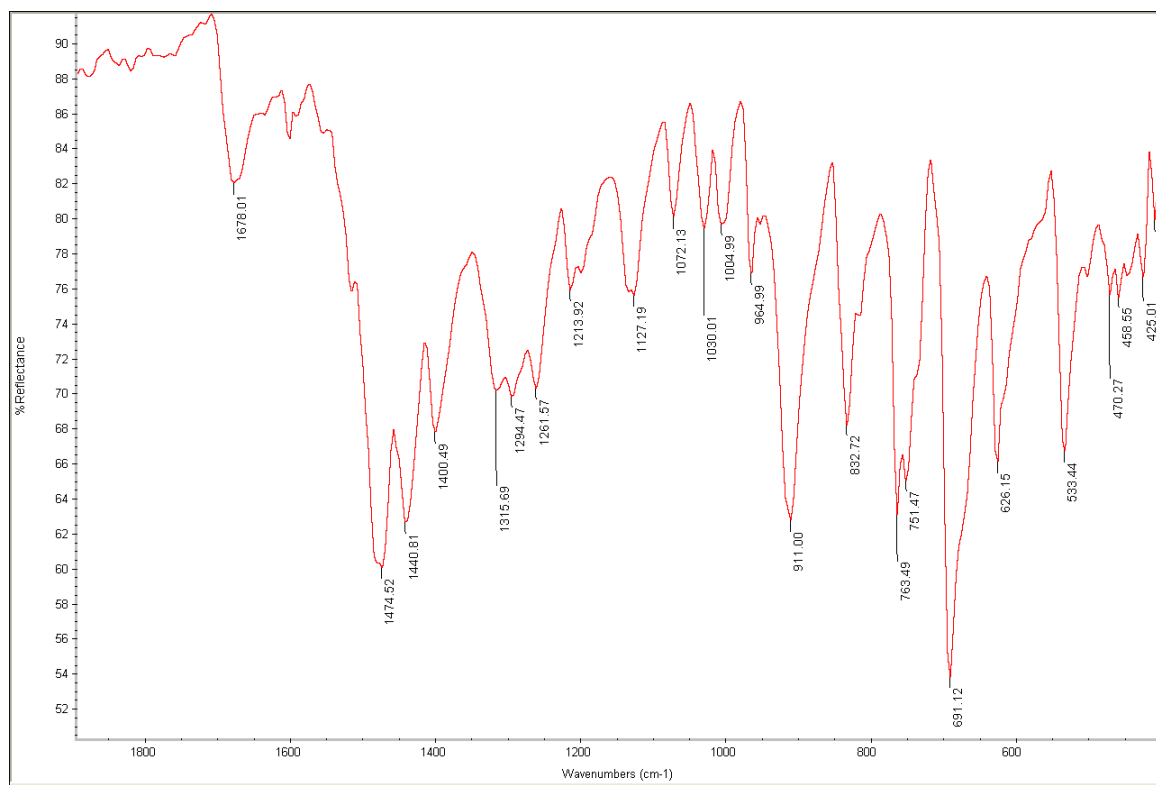

$\text{UO}_2$  asymmetric stretch ( $\nu_3$ ):  $911\text{ cm}^{-1}$

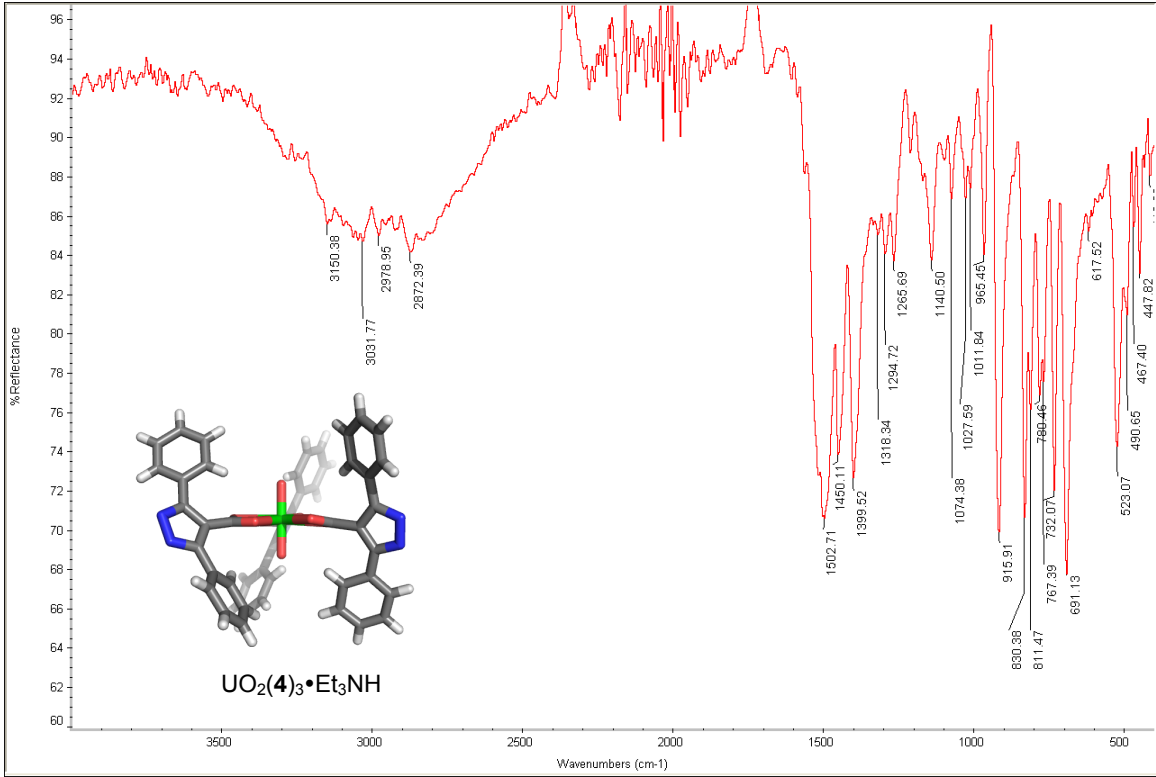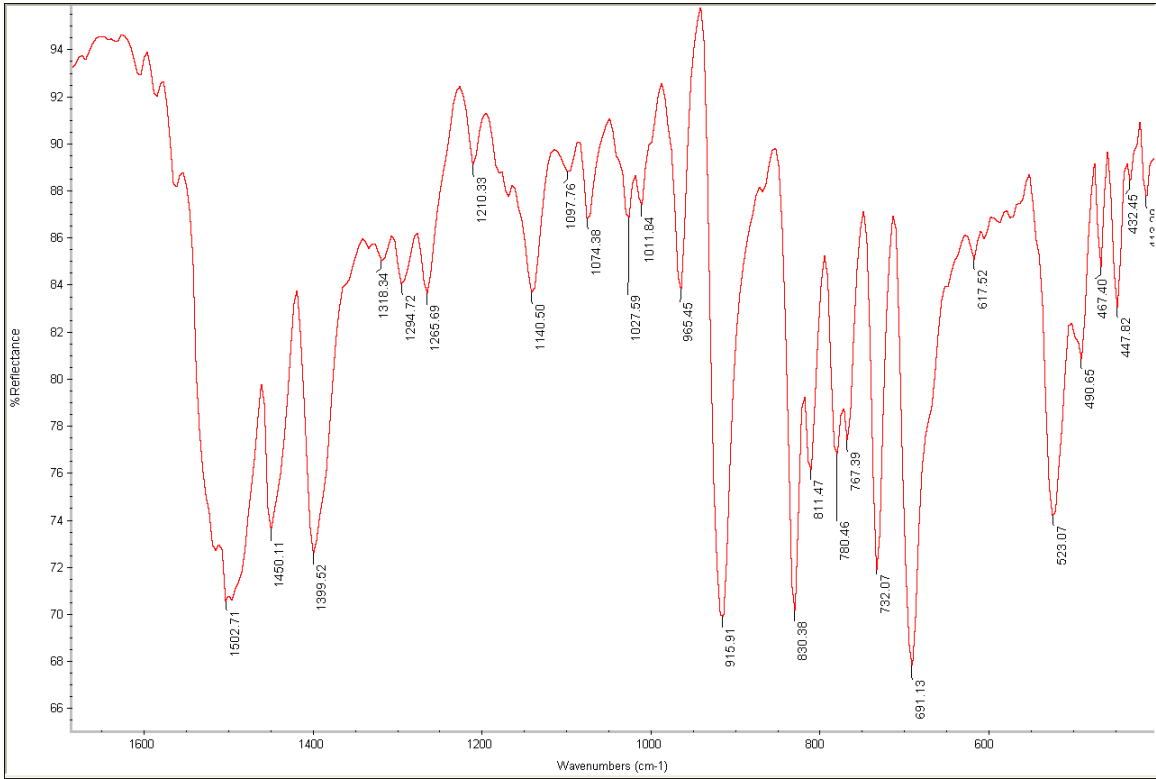

$\text{UO}_2$  asymmetric stretch ( $\nu_3$ ):  $915 \text{ cm}^{-1}$

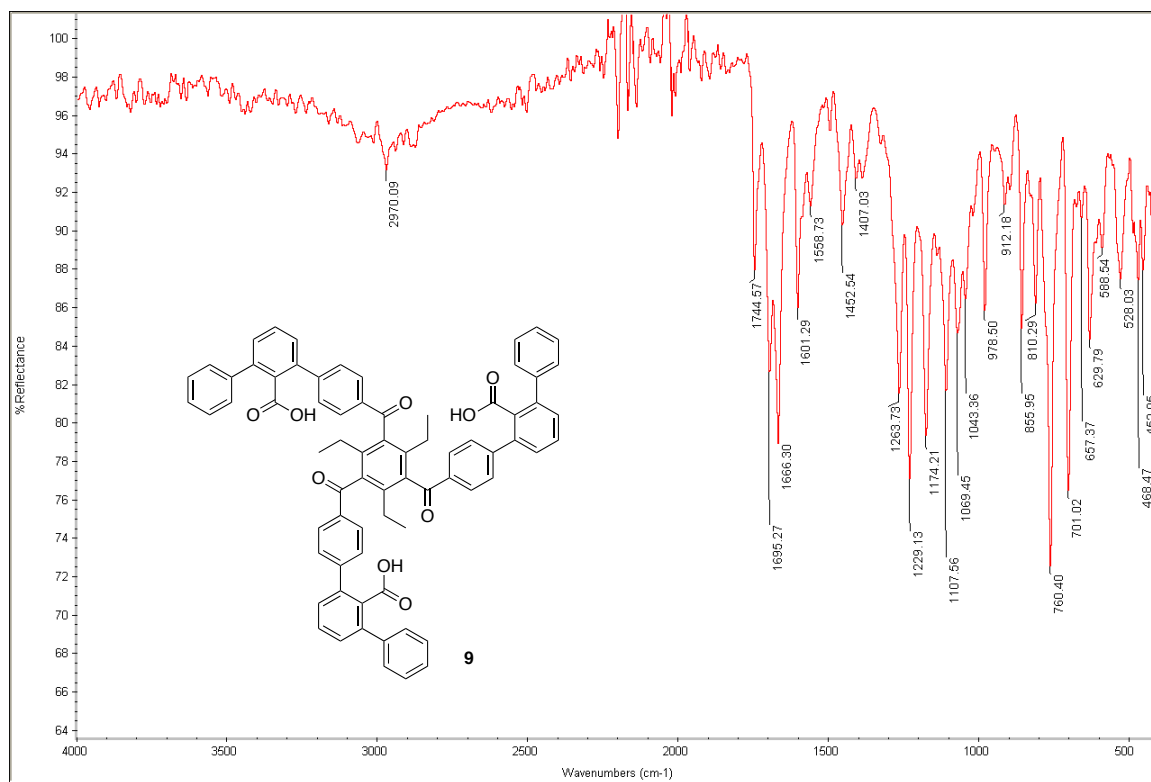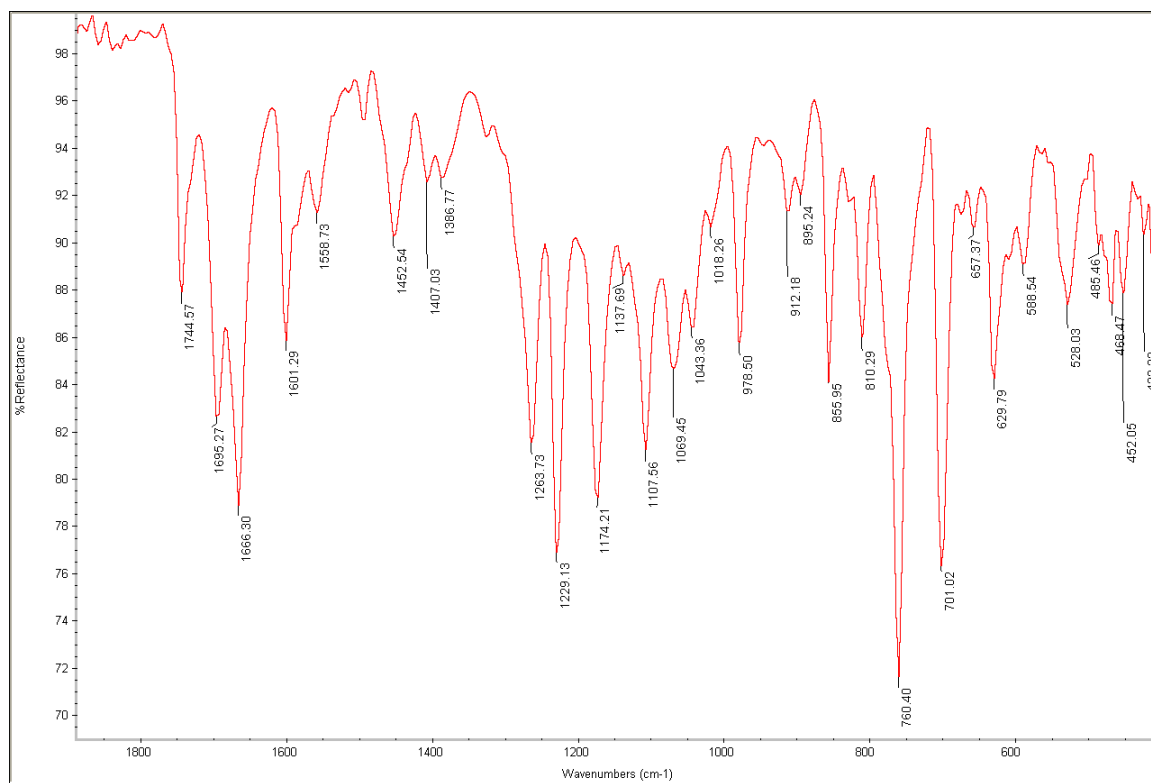

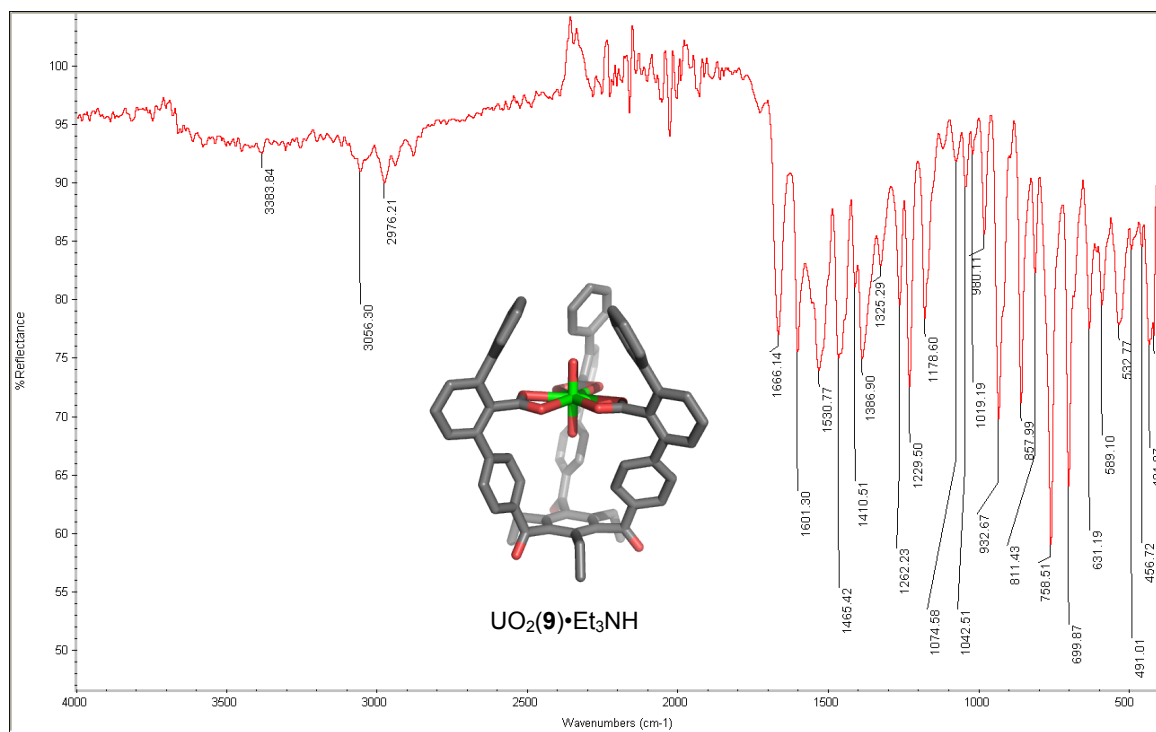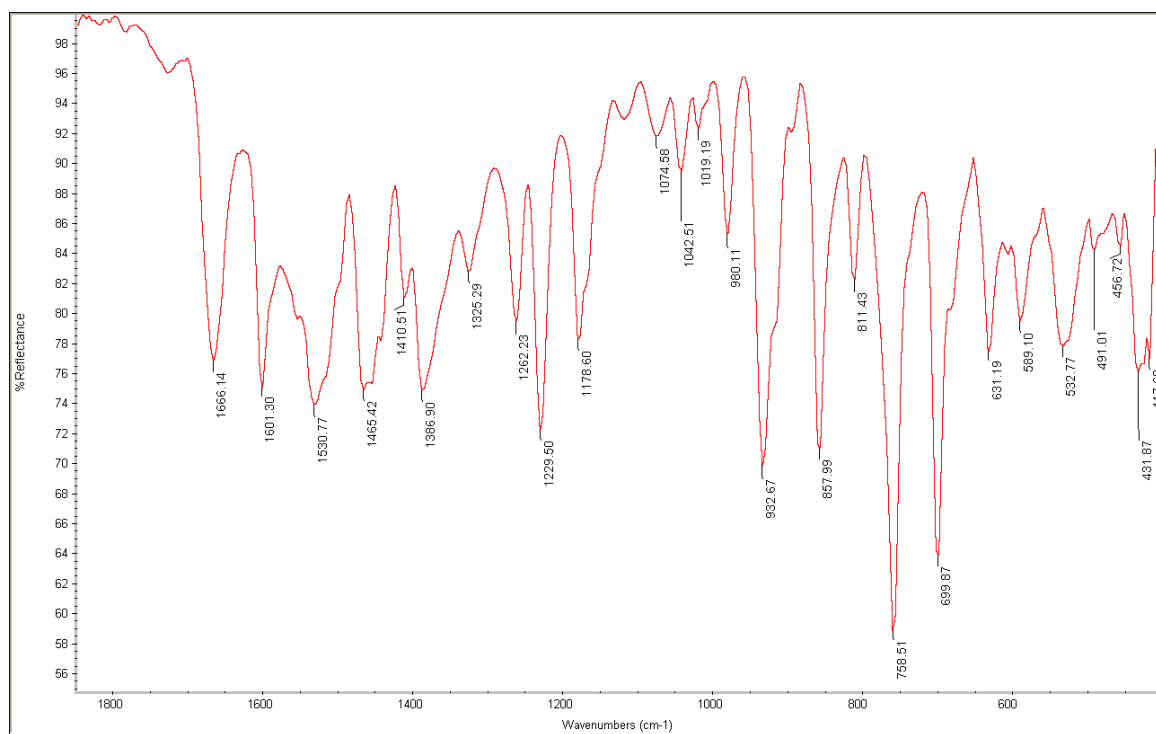

(a)  $\text{UO}_2$  asymmetric stretch ( $\nu_3$ ):  $932 \text{ cm}^{-1}$  (b)  $\text{UO}_2$  symmetric stretch ( $\nu_1$ ):  $857 \text{ cm}^{-1}$

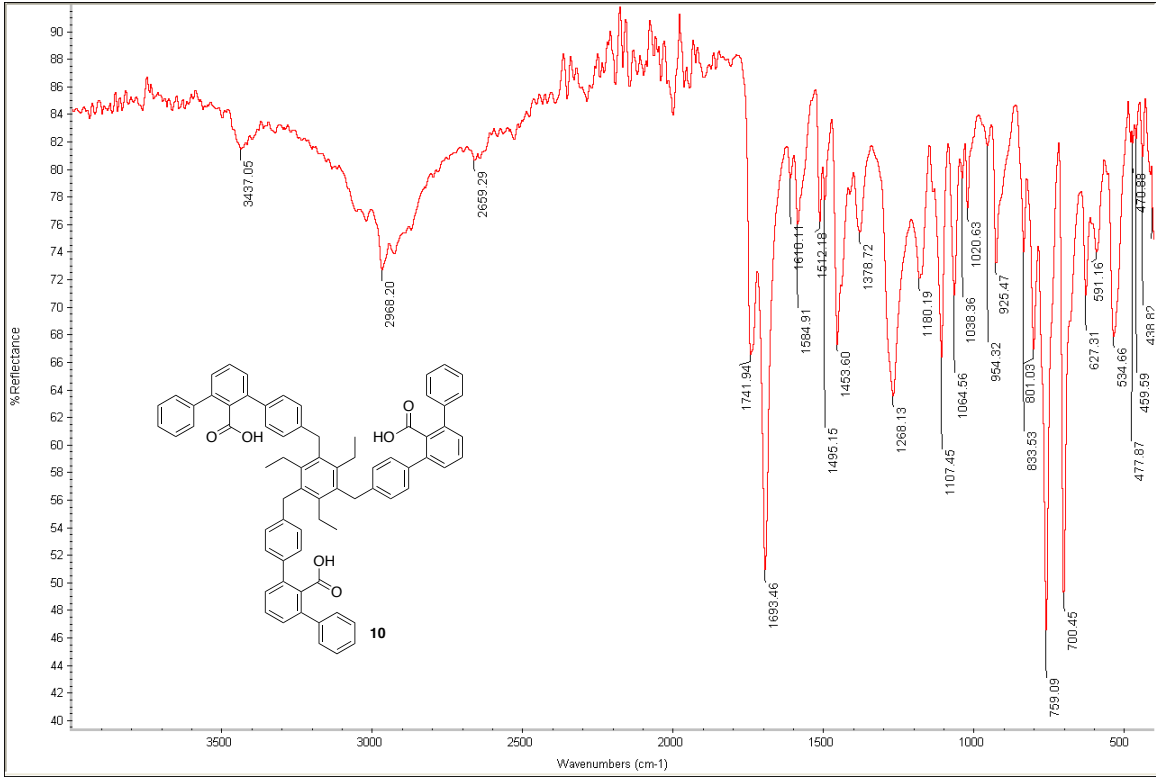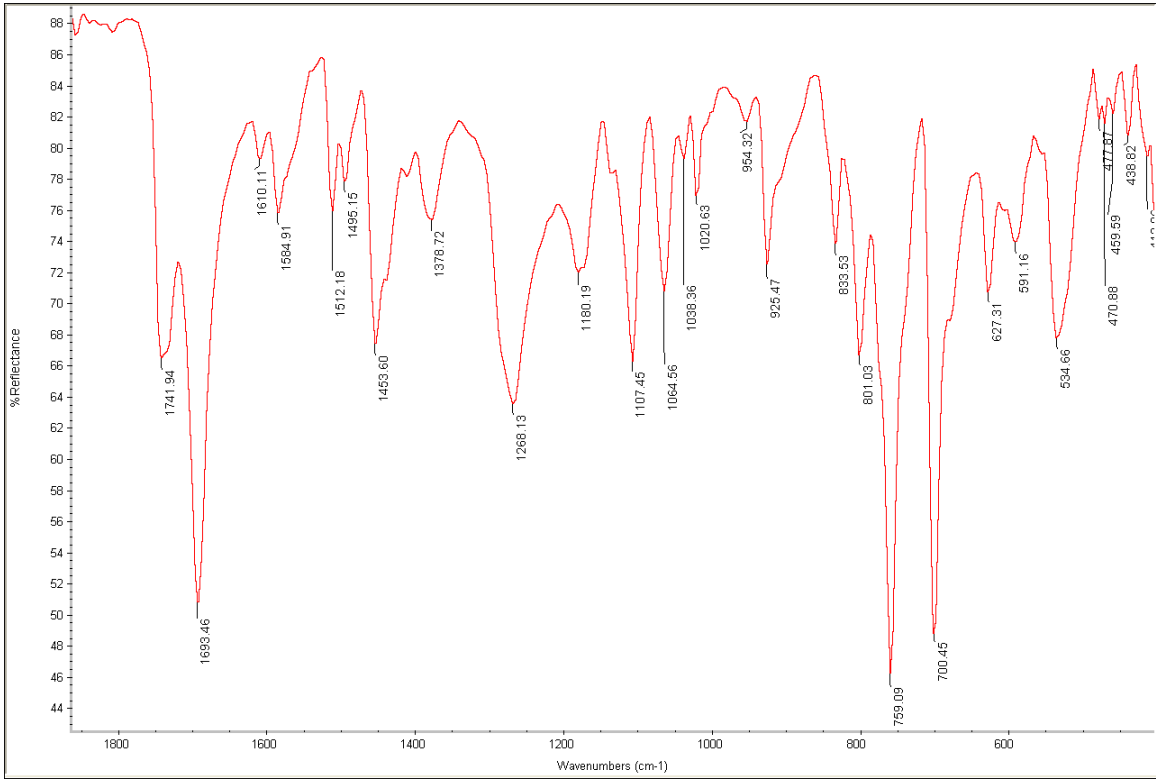

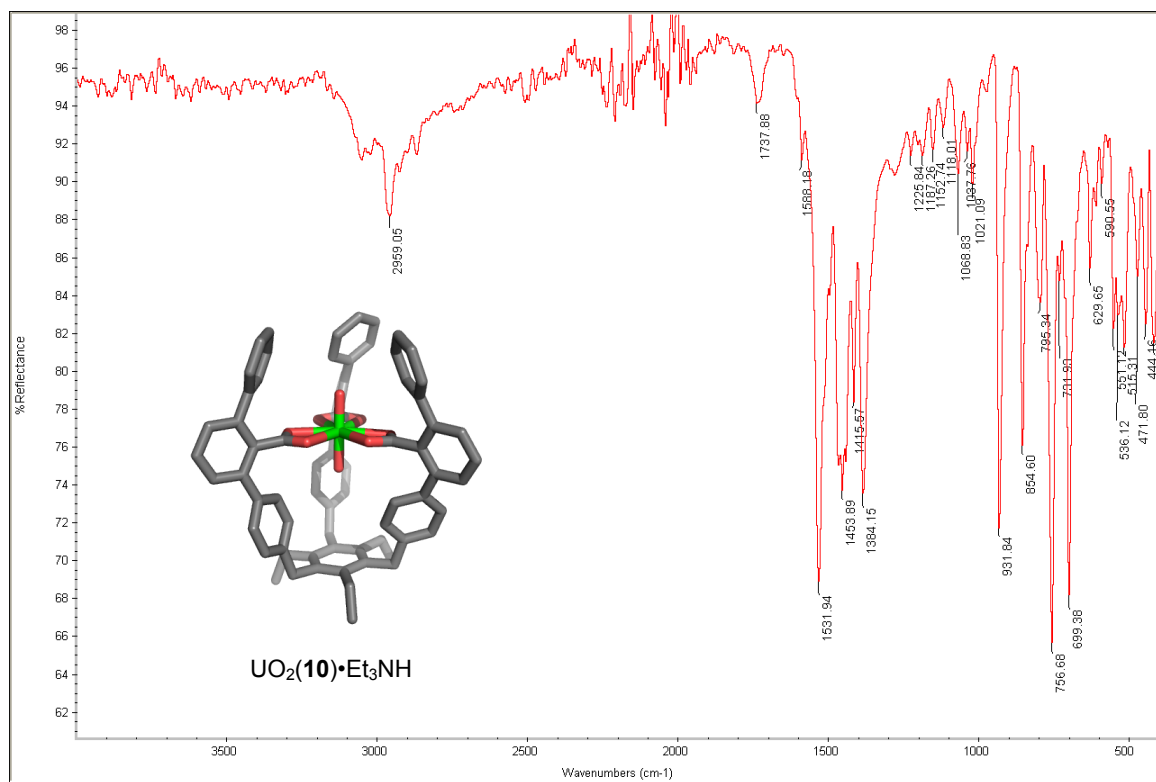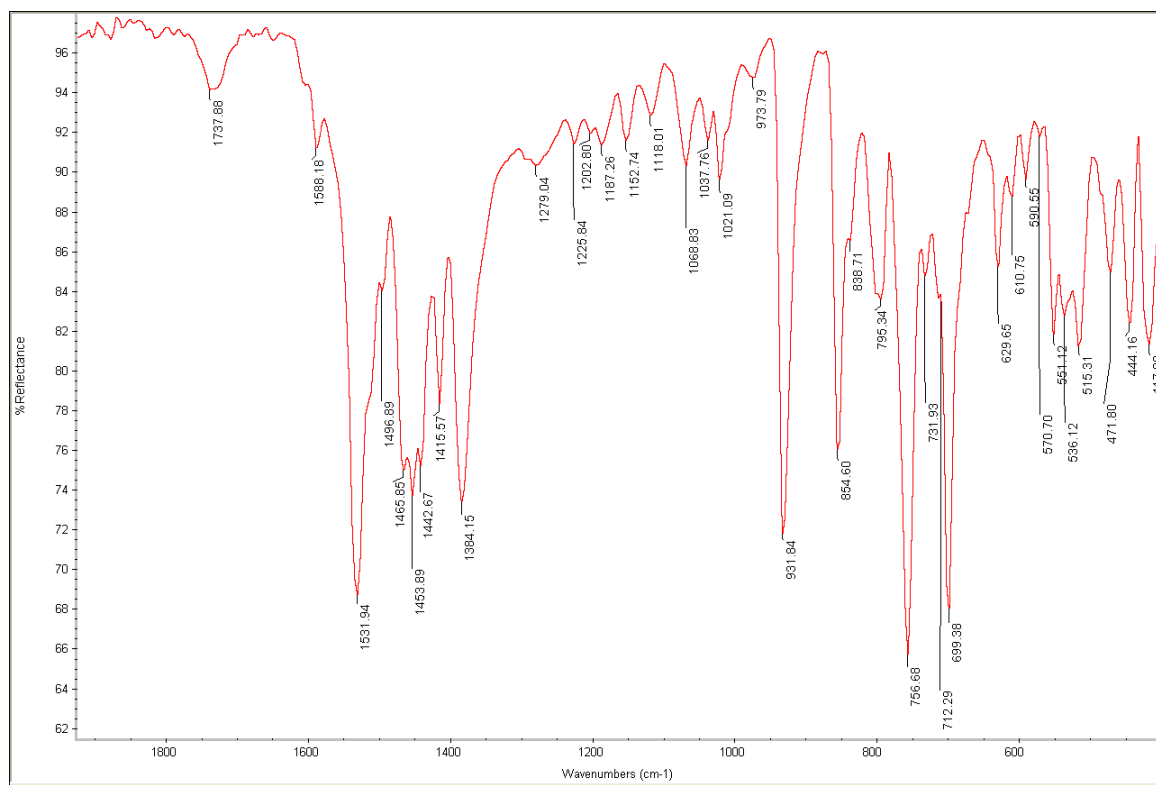

(a)  $\text{UO}_2$  asymmetric stretch ( $\nu_3$ ): 931 cm<sup>-1</sup> (b)  $\text{UO}_2$  symmetric stretch ( $\nu_1$ ): 854 cm<sup>-1</sup>

## **Extraction of a 400 ppm UO<sub>2</sub> solution in a pH 5 acetate buffer with 9 and 10**

### **Preparation of Uranyl Stock Solutions:**

A 2000 ppm uranium stock solution was prepared by dissolving 422 mg UO<sub>2</sub>(NO<sub>3</sub>)<sub>2</sub>•6H<sub>2</sub>O in 100 mL aqueous acetate buffer with the pH adjusted to 5. This solution was used to prepare further solutions at lower concentrations (400 ppm).

A 400 ppm uranium stock solution (or a 1.68 mM UO<sub>2</sub> solution) was prepared by adding 10 mL of the 2000ppm stock solution to a 50 mL volumetric flask and filling to the final volume with aqueous acetate buffer adjusted to pH 5. All measurements measured with Inductively Coupled Plasma-Atomic Emission Spectroscopy (ICP-AES)

### **Preparation of U standards to Calibrate the ICP-AES:**

**Blank:** To a 25 mL volumetric flask was added 250 µL of a 1000 ppm Yttrium standard (Inorganic Ventures, catalog #CGY1-1) and the remainder of the volume was filled with 2% HNO<sub>3</sub>.

**100 ppb:** To a 25 mL volumetric flask was added 250 µL of a 10 ppm uranium standard (Inorganic Ventures, catalog #MSU-10PPM), 250 µL of a 1000 ppm yttrium standard, and the remainder of the volume was filled with 2% HNO<sub>3</sub>.

**200 ppb:** To a 25 mL volumetric flask was added 500 µL of a 10 ppm uranium standard, 250 µL of a 1000 ppm yttrium standard, and the remainder of the volume was filled with 2% HNO<sub>3</sub>.

**400 ppb:** To a 50 mL volumetric flask was added 2 mL of a 10 ppm uranium standard, 500 µL of a 1000 ppm yttrium standard, and the remainder of the volume was filled with 2% HNO<sub>3</sub>.

**600 ppb:** To a 50 mL volumetric flask was added 3 mL of a 10 ppm uranium standard, 500 µL of a 1000 ppm yttrium standard, and the remainder of the volume was filled with 2% HNO<sub>3</sub>.

**800 ppb:** To a 25 mL volumetric flask was added 2 mL of a 10 ppm uranium standard, 250 µL of a 1000 ppm yttrium standard, and the remainder of the volume was filled with 2% HNO<sub>3</sub>.

All analysis was completed on a Varian Vista AX CCD Simultaneous ICP-AES.



#### Preparation of Ligand (**9** and **10**) solutions for extraction:

A 1 mM solution was prepared by dissolving **9** (0.011 g, 0.01 mmol) in 10 mL chloroform.

A 1 mM solution was prepared by dissolving **10** (0.010 g, 0.01 mmol) in 10 mL chloroform.

#### General Liquid-Liquid Extraction of a pH 5 400 ppm UO<sub>2</sub> Solution:

The extractions were performed by mixing an organic phase (1 mL ligand solution) with an aqueous phase (1 mL 400 ppm UO<sub>2</sub>) overnight. After vigorous mixing, 0.010 mL was taken from the aqueous layer and placed in a 10 mL volumetric flask that has been charged with 100 µL of a 1000 ppm yttrium internal standard. The mixture was diluted to 10 mL with 2% HNO<sub>3</sub> and the concentration of U in the aqueous phase was determined by ICP-AES.

To determine how much UO<sub>2</sub> is extracted into pure chloroform, a blank was prepared by mixing 1 mL chloroform with 1 mL 400 ppm UO<sub>2</sub> overnight. After vigorous mixing, 0.010 mL was taken from the aqueous layer and placed in a 10 mL volumetric flask that has been charged with 100 µL of a 1000 ppm yttrium internal standard. The mixture was diluted to 10 mL with 2% HNO<sub>3</sub> and the concentration of U in the aqueous phase was determined by ICP-AES.

The concentration of U in the 400 ppm stock solution was also measured prior to mixing. 0.010 mL of the stock solution was placed in a 10 mL volumetric flask that has been charged with 100 µL of a 1000 ppm yttrium internal standard. The mixture was diluted to 10 mL with 2% HNO<sub>3</sub> and the concentration of U in the aqueous phase was determined by ICP-AES.

For 1 mL of a 400 ppm U solution, if every ligand ( $1 \times 10^{-6}$  mol) in the organic phase were to extract a uranyl ion ( $1.68 \times 10^{-6}$  mol), there would be  $0.68 \times 10^{-6}$  mol (or ~160 ppm U) uranyl ion remaining in the aqueous phase.

Percent U extracted by either ligand (**9** or **10**) was calculated by treating the blank U concentration as the total U available in the aqueous phase to correct for the U extracted into the organic phase without any ligand present.

For example, for 1 mL of a 383 ppm U solution, if every ligand ( $1 \times 10^{-6}$  mol) in the organic phase were to extract a uranyl ion ( $1.61 \times 10^{-6}$  mol), there would be  $0.61 \times 10^{-6}$  mol (or ~145 ppm) uranyl ion remaining in the aqueous phase (see Table 6-1). 145 ppm U was then subtracted from the concentration of U in the blank (383 ppm = U<sub>initial</sub>) to give the amount of total U (U<sub>total</sub>) available for the ligands to extract: 383–145 = 238 ppm = U<sub>total</sub>. U<sub>initial</sub> was then subtracted from the average extraction value of either ligand.

As an example for **9**:  $383 - 330 = 53$  ppm U extracted into the organic phase by **9** ( $U_{9\text{ext}}$ ). Finally the percentage of U extracted was calculated by:  $U_{9\text{ext}} / U_{\text{total}} * 100 = \sim 22 \%$ . Error for identical liquid-liquid extraction experiments at this concentration and volume was previously found to be 9% by taking the standard deviation of three separate extractions.

**Table S1.** Extraction of a pH 5 400 ppm  $\text{UO}_2$  solution with **9** and **10**.

| Sample               | U conc.<br>(ppm) | avg | % U Extracted |
|----------------------|------------------|-----|---------------|
| 400ppb stock         | 405              | 403 |               |
|                      | 393              |     |               |
|                      | 411              |     |               |
| Blank                | 385              | 383 |               |
|                      | 380              |     |               |
| Ligand <b>9</b> ext  | 328              | 330 | $22 \pm 9 \%$ |
|                      | 344              |     |               |
|                      | 319              |     |               |
| Ligand <b>10</b> ext | 330              | 328 | $23 \pm 9 \%$ |
|                      | 331              |     |               |
|                      | 323              |     |               |

## **Crystallographic Information**

### **UO<sub>2</sub>(4)<sub>2</sub>(pyr)<sub>2</sub>**

**Table S2.** Crystal data and structure refinement for UO<sub>2</sub>(4)<sub>2</sub>(pyr)<sub>2</sub>.

|                                   |                                             |                 |
|-----------------------------------|---------------------------------------------|-----------------|
| Identification code               | CCDC #930587                                |                 |
| Empirical formula                 | C52 H42 N8 O6 U                             |                 |
| Molecular formula                 | C42 H32 N6 O6 U, 2(C5 H5 N)                 |                 |
| Formula weight                    | 1112.96                                     |                 |
| Temperature                       | 100(2) K                                    |                 |
| Wavelength                        | 1.54178 Å                                   |                 |
| Crystal system                    | Monoclinic                                  |                 |
| Space group                       | P 21/c                                      |                 |
| Unit cell dimensions              | a = 16.8356(11) Å                           | α = 90°.        |
|                                   | b = 9.0753(6) Å                             | β = 93.824(2)°. |
|                                   | c = 14.9922(10) Å                           | γ = 90°.        |
| Volume                            | 2285.5(3) Å <sup>3</sup>                    |                 |
| Z                                 | 2                                           |                 |
| Density (calculated)              | 1.617 Mg/m <sup>3</sup>                     |                 |
| Absorption coefficient            | 10.493 mm <sup>-1</sup>                     |                 |
| F(000)                            | 1100                                        |                 |
| Crystal size                      | 0.287 x 0.116 x 0.106 mm <sup>3</sup>       |                 |
| Crystal color, habit              | Colorless Block                             |                 |
| Theta range for data collection   | 2.630 to 57.703°.                           |                 |
| Index ranges                      | -18 ≤ h ≤ 16, -9 ≤ k ≤ 9, -8 ≤ l ≤ 16       |                 |
| Reflections collected             | 17768                                       |                 |
| Independent reflections           | 3065 [R(int) = 0.0391]                      |                 |
| Completeness to theta = 67.679°   | 74.3 %                                      |                 |
| Absorption correction             | Semi-empirical from equivalents             |                 |
| Max. and min. transmission        | 0.7451 and 0.5243                           |                 |
| Refinement method                 | Full-matrix least-squares on F <sup>2</sup> |                 |
| Data / restraints / parameters    | 3065 / 0 / 308                              |                 |
| Goodness-of-fit on F <sup>2</sup> | 1.087                                       |                 |
| Final R indices [I > 2σ(I)]       | R1 = 0.0218, wR2 = 0.0613                   |                 |
| R indices (all data)              | R1 = 0.0241, wR2 = 0.0648                   |                 |
| Extinction coefficient            | n/a                                         |                 |
| Largest diff. peak and hole       | 0.860 and -0.679 e.Å <sup>-3</sup>          |                 |

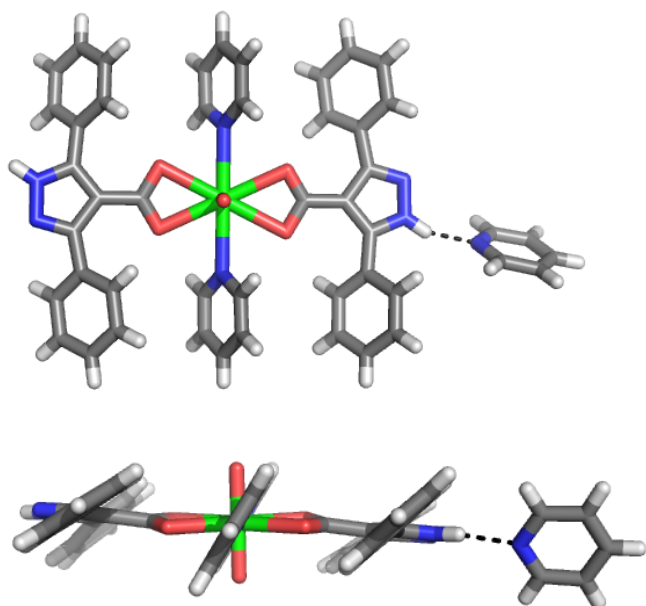

(pyr)<sub>2</sub>4<sub>2</sub>UO<sub>2</sub>: C<sub>42</sub> H<sub>32</sub> N<sub>6</sub> O<sub>6</sub> U, 2(C<sub>5</sub> H<sub>5</sub> N), *M* = 1112.96, Monoclinic, *P*2<sub>1</sub>/*c*, *a* = 16.8356(11), *b* = 9.0754(6), *c* = 14.9921(10) Å, *α* = 90.00°, *β* = 93.824(2)°, *γ* = 90.00°, *V* = 2285.5(3) Å<sup>3</sup>, *Z* = 2, *ρ*<sub>calcd</sub> = 1.617 g mL<sup>-1</sup>, *μ*(Cu-Kα) = 10.49 mm<sup>-1</sup>, *θ*<sub>max</sub> = 57.7°, *T* = 100(2) K, 17762 reflections collected, *R*<sub>1</sub> = 0.0218 for 2709 reflections, *R*<sub>int</sub> = 0.039, (304 parameters) with *I* > 2σ(*I*), and *R*<sub>1</sub> = 0.0242, *wR*<sub>2</sub> = 0.0648, *GooF* = 1.09 for all 3067 data, CCDC #930587.

# UO<sub>2</sub>(4)<sub>3</sub>

**Table S3.** Crystal data and structure refinement for UO<sub>2</sub>(4)<sub>3</sub>.

|                                   |                                                                                                                                                                                     |                  |
|-----------------------------------|-------------------------------------------------------------------------------------------------------------------------------------------------------------------------------------|------------------|
| Identification code               | CCDC #930586                                                                                                                                                                        |                  |
| Empirical formula                 | C <sub>58.50</sub> H <sub>62</sub> N <sub>7</sub> O <sub>10</sub> U                                                                                                                 |                  |
| Molecular formula                 | C <sub>48</sub> H <sub>33</sub> N <sub>6</sub> O <sub>8</sub> U, C <sub>6</sub> H <sub>16</sub> N, C <sub>4</sub> H <sub>10</sub> O, 0.5(C H <sub>4</sub> O), 0.5(H <sub>2</sub> O) |                  |
| Formula weight                    | 1261.18                                                                                                                                                                             |                  |
| Temperature                       | 100(2) K                                                                                                                                                                            |                  |
| Wavelength                        | 1.54178 Å                                                                                                                                                                           |                  |
| Crystal system                    | Monoclinic                                                                                                                                                                          |                  |
| Space group                       | P 21/n                                                                                                                                                                              |                  |
| Unit cell dimensions              | a = 14.4680(11) Å                                                                                                                                                                   | α = 90°.         |
|                                   | b = 31.719(2) Å                                                                                                                                                                     | β = 103.416(3)°. |
|                                   | c = 25.7639(18) Å                                                                                                                                                                   | γ = 90°.         |
| Volume                            | 11500.6(15) Å <sup>3</sup>                                                                                                                                                          |                  |
| Z                                 | 8                                                                                                                                                                                   |                  |
| Density (calculated)              | 1.457 Mg/m <sup>3</sup>                                                                                                                                                             |                  |
| Absorption coefficient            | 8.455 mm <sup>-1</sup>                                                                                                                                                              |                  |
| F(000)                            | 5072                                                                                                                                                                                |                  |
| Crystal size                      | 0.151 x 0.093 x 0.055 mm <sup>3</sup>                                                                                                                                               |                  |
| Crystal color, habit              | Colorless Block                                                                                                                                                                     |                  |
| Theta range for data collection   | 3.225 to 67.774°.                                                                                                                                                                   |                  |
| Index ranges                      | -17 ≤ h ≤ 17, -36 ≤ k ≤ 38, -30 ≤ l ≤ 25                                                                                                                                            |                  |
| Reflections collected             | 92864                                                                                                                                                                               |                  |
| Independent reflections           | 20520 [R(int) = 0.0363]                                                                                                                                                             |                  |
| Completeness to theta = 68.000°   | 97.9 %                                                                                                                                                                              |                  |
| Absorption correction             | Semi-empirical from equivalents                                                                                                                                                     |                  |
| Max. and min. transmission        | 0.0933 and 0.0140                                                                                                                                                                   |                  |
| Refinement method                 | Full-matrix least-squares on F <sup>2</sup>                                                                                                                                         |                  |
| Data / restraints / parameters    | 20520 / 30 / 1303                                                                                                                                                                   |                  |
| Goodness-of-fit on F <sup>2</sup> | 1.205                                                                                                                                                                               |                  |
| Final R indices [I > 2σ(I)]       | R1 = 0.0762, wR2 = 0.1705                                                                                                                                                           |                  |
| R indices (all data)              | R1 = 0.0773, wR2 = 0.1709                                                                                                                                                           |                  |
| Extinction coefficient            | n/a                                                                                                                                                                                 |                  |
| Largest diff. peak and hole       | 2.824 and -2.735 e.Å <sup>-3</sup>                                                                                                                                                  |                  |

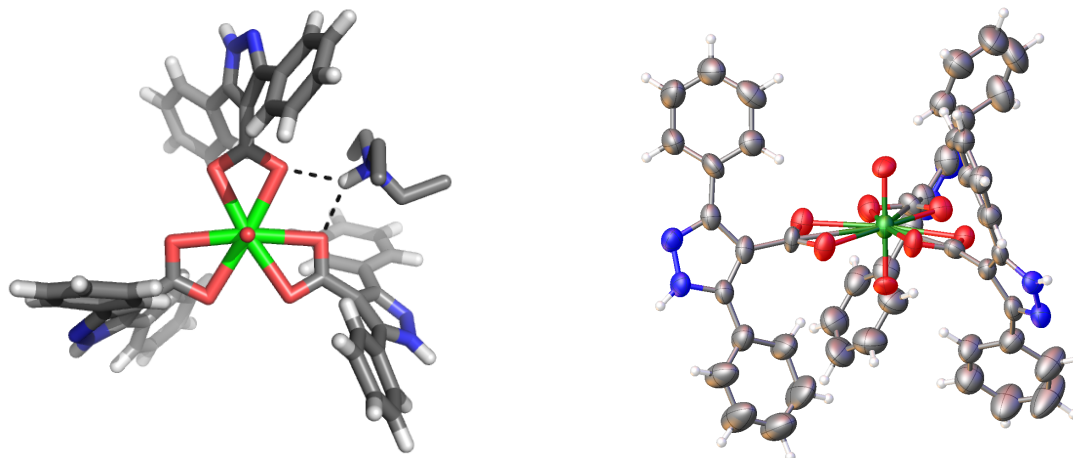

Et<sub>3</sub>NH<sup>+</sup>•4<sub>3</sub>UO<sub>2</sub><sup>-</sup>: C<sub>48</sub> H<sub>33</sub> N<sub>6</sub> O<sub>8</sub> U, C<sub>6</sub> H<sub>16</sub> N, C<sub>4</sub> H<sub>10</sub> O, 0.5(C H<sub>4</sub> O), 0.5(H<sub>2</sub> O), *M* = 1261.18, Monoclinic, *P*2<sub>1</sub>/n, *a* = 14.4680(11), *b* = 31.719(2), *c* = 25.7639(18) Å, α = 90.00°, β = 103.416(3)°, γ = 90.00°, *V* = 11500.6(15) Å<sup>3</sup>, *Z* = 8, ρ<sub>calcd</sub> = 1.453 g mL<sup>-1</sup>, μ(Cu-Kα) = 8.46 mm<sup>-1</sup>, θ<sub>max</sub> = 68.00°, *T* = 100(2) K, 92864 reflections collected, *R*<sub>1</sub> = 0.0762 for 19904 reflections, *R*<sub>int</sub> = 0.036 (1303 parameters) with *I* > 2σ(*I*), and *R*<sub>1</sub> = 0.0773, *wR*<sub>2</sub> = 0.1709, GooF = 1.205 for all 20520 data, CCDC #930586.

# UO<sub>2</sub>(**9**)<sub>3</sub>

**Table S4.** Crystal data and structure refinement for UO<sub>2</sub>(**9**).

|                                   |                                                                                                                                                 |                  |
|-----------------------------------|-------------------------------------------------------------------------------------------------------------------------------------------------|------------------|
| Identification code               | CCDC #930588                                                                                                                                    |                  |
| Empirical formula                 | C <sub>88</sub> H <sub>87</sub> Cl <sub>5</sub> N O <sub>11</sub> U                                                                             |                  |
| Molecular formula                 | C <sub>72</sub> H <sub>51</sub> O <sub>11</sub> U, 1.5(C <sub>5</sub> H <sub>10</sub> ), 2.5(C H <sub>2</sub> Cl <sub>2</sub> ), C <sub>6</sub> |                  |
| H <sub>16</sub> N                 |                                                                                                                                                 |                  |
| Formula weight                    | 1749.86                                                                                                                                         |                  |
| Temperature                       | 100(2) K                                                                                                                                        |                  |
| Wavelength                        | 0.71073 Å                                                                                                                                       |                  |
| Crystal system                    | Monoclinic                                                                                                                                      |                  |
| Space group                       | P 2 <sub>1</sub> /n                                                                                                                             |                  |
| Unit cell dimensions              | a = 19.6677(9) Å                                                                                                                                | α = 90°.         |
|                                   | b = 18.8428(9) Å                                                                                                                                | β = 109.593(2)°. |
|                                   | c = 22.6324(10) Å                                                                                                                               | γ = 90°.         |
| Volume                            | 7901.8(6) Å <sup>3</sup>                                                                                                                        |                  |
| Z                                 | 4                                                                                                                                               |                  |
| Density (calculated)              | 1.471 Mg/m <sup>3</sup>                                                                                                                         |                  |
| Absorption coefficient            | 2.285 mm <sup>-1</sup>                                                                                                                          |                  |
| F(000)                            | 3548                                                                                                                                            |                  |
| Crystal size                      | 0.153 x 0.147 x 0.112 mm <sup>3</sup>                                                                                                           |                  |
| Crystal color, habit              | Colorless Block                                                                                                                                 |                  |
| Theta range for data collection   | 2.738 to 26.422°.                                                                                                                               |                  |
| Index ranges                      | -24 ≤ h ≤ 24, -23 ≤ k ≤ 22, -26 ≤ l ≤ 28                                                                                                        |                  |
| Reflections collected             | 64835                                                                                                                                           |                  |
| Independent reflections           | 16177 [R(int) = 0.0846]                                                                                                                         |                  |
| Completeness to theta = 25.242°   | 99.7 %                                                                                                                                          |                  |
| Absorption correction             | Semi-empirical from equivalents                                                                                                                 |                  |
| Max. and min. transmission        | 0.7454 and 0.6506                                                                                                                               |                  |
| Refinement method                 | Full-matrix least-squares on F <sup>2</sup>                                                                                                     |                  |
| Data / restraints / parameters    | 16177 / 28 / 949                                                                                                                                |                  |
| Goodness-of-fit on F <sup>2</sup> | 1.010                                                                                                                                           |                  |
| Final R indices [I > 2σ(I)]       | R <sub>1</sub> = 0.0472, wR <sub>2</sub> = 0.0900                                                                                               |                  |
| R indices (all data)              | R <sub>1</sub> = 0.0915, wR <sub>2</sub> = 0.1028                                                                                               |                  |
| Extinction coefficient            | n/a                                                                                                                                             |                  |
| Largest diff. peak and hole       | 1.222 and -1.235 e.Å <sup>-3</sup>                                                                                                              |                  |

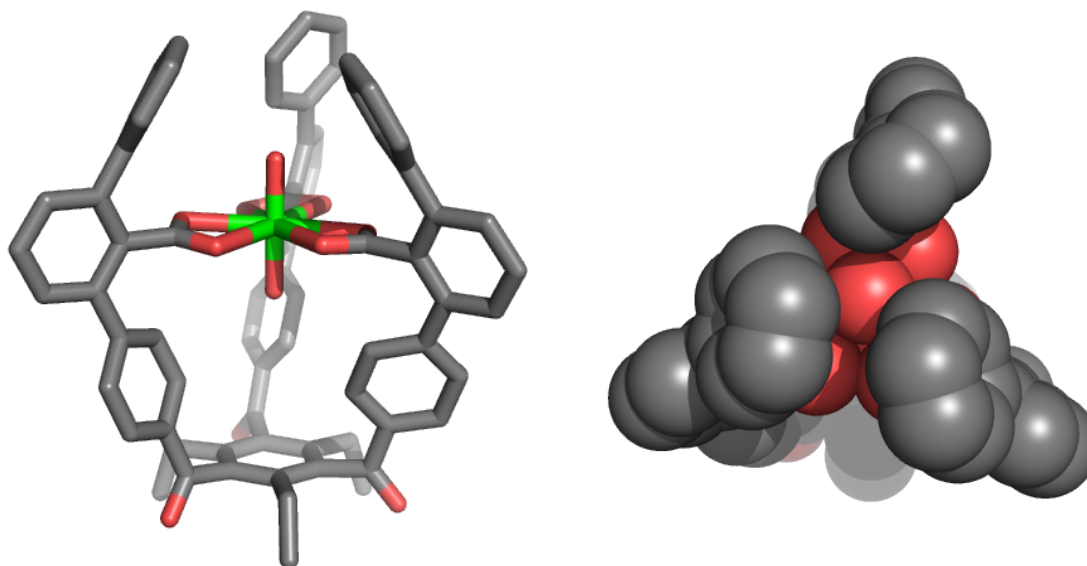

Et<sub>3</sub>NH<sup>+</sup>•9UO<sub>2</sub><sup>-</sup>: C<sub>72</sub> H<sub>51</sub> O<sub>11</sub> U, 1.5(C<sub>5</sub> H<sub>10</sub>), 2.5(C H<sub>2</sub> Cl<sub>2</sub>), C<sub>6</sub> H<sub>16</sub> N, *M* = 1749.86, Monoclinic, *P*2<sub>1</sub>/n, *a* = 19.6677(9), *b* = 18.8428(9), *c* = 22.6324(10) Å, α = 90.00°, β = 109.593(2)°, γ = 90.00°, *V* = 7901.8(6) Å<sup>3</sup>, *Z* = 4, ρ<sub>calcd</sub> = 1.471 g mL<sup>-1</sup>, μ(Mo-Kα) = 2.286 mm<sup>-1</sup>, θ<sub>max</sub> = 25.242°, *T* = 100(2) K, 64835 reflections collected, *R*<sub>1</sub> = 0.0472 for 10896 reflections, *R*<sub>int</sub> = 0.0846, (949 parameters) with *I* > 2σ(*I*), and *R*<sub>1</sub> = 0.0915, *wR*<sub>2</sub> = 0.1028, GooF = 1.010 for all 16177 data, CCDC #930588.



**UO<sub>2</sub>(10)<sub>3</sub>**

**Table S5.** Crystal data and structure refinement for UO<sub>2</sub>(10).

|                                   |                                                                                                           |                 |
|-----------------------------------|-----------------------------------------------------------------------------------------------------------|-----------------|
| Identification code               | CCDC #940964                                                                                              |                 |
| Empirical formula                 | C <sub>82</sub> H <sub>89</sub> N O <sub>12</sub> U                                                       |                 |
| Molecular formula                 | C <sub>72</sub> H <sub>57</sub> O <sub>8</sub> U, C <sub>6</sub> H <sub>16</sub> N, 4(C H <sub>4</sub> O) |                 |
| Formula weight                    | 1518.57                                                                                                   |                 |
| Temperature                       | 100(2) K                                                                                                  |                 |
| Wavelength                        | 1.54178 Å                                                                                                 |                 |
| Crystal system                    | Monoclinic                                                                                                |                 |
| Space group                       | P 21/n                                                                                                    |                 |
| Unit cell dimensions              | a = 14.2622(12) Å                                                                                         | α = 90°.        |
|                                   | b = 18.6958(15) Å                                                                                         | β = 93.484(3)°. |
|                                   | c = 26.384(2) Å                                                                                           | γ = 90°.        |
| Volume                            | 7022.1(10) Å <sup>3</sup>                                                                                 |                 |
| Z                                 | 4                                                                                                         |                 |
| Density (calculated)              | 1.436 Mg/m <sup>3</sup>                                                                                   |                 |
| Absorption coefficient            | 7.021 mm <sup>-1</sup>                                                                                    |                 |
| F(000)                            | 3104                                                                                                      |                 |
| Crystal size                      | 0.3 x 0.05 x 0.05 mm <sup>3</sup>                                                                         |                 |
| Crystal color, habit              | Colorless Block                                                                                           |                 |
| Theta range for data collection   | 2.90 to 68.00°.                                                                                           |                 |
| Index ranges                      | -15 ≤ h ≤ 16, -22 ≤ k ≤ 15, -31 ≤ l ≤ 31                                                                  |                 |
| Reflections collected             | 56122                                                                                                     |                 |
| Independent reflections           | 12372 [R(int) = 0.0302]                                                                                   |                 |
| Completeness to theta = 67.17°    | 98.5 %                                                                                                    |                 |
| Absorption correction             | multi-scan                                                                                                |                 |
| Max. and min. transmission        | 0.7529 and 0.4520                                                                                         |                 |
| Refinement method                 | Full-matrix least-squares on F <sup>2</sup>                                                               |                 |
| Data / restraints / parameters    | 12372 / 1 / 900                                                                                           |                 |
| Goodness-of-fit on F <sup>2</sup> | 1.062                                                                                                     |                 |
| Final R indices [I > 2σ(I)]       | R1 = 0.0228, wR2 = 0.0559                                                                                 |                 |
| R indices (all data)              | R1 = 0.0246, wR2 = 0.0568                                                                                 |                 |
| Extinction coefficient            | n/a                                                                                                       |                 |
| Largest diff. peak and hole       | 0.848 and -0.825 e.Å <sup>-3</sup>                                                                        |                 |

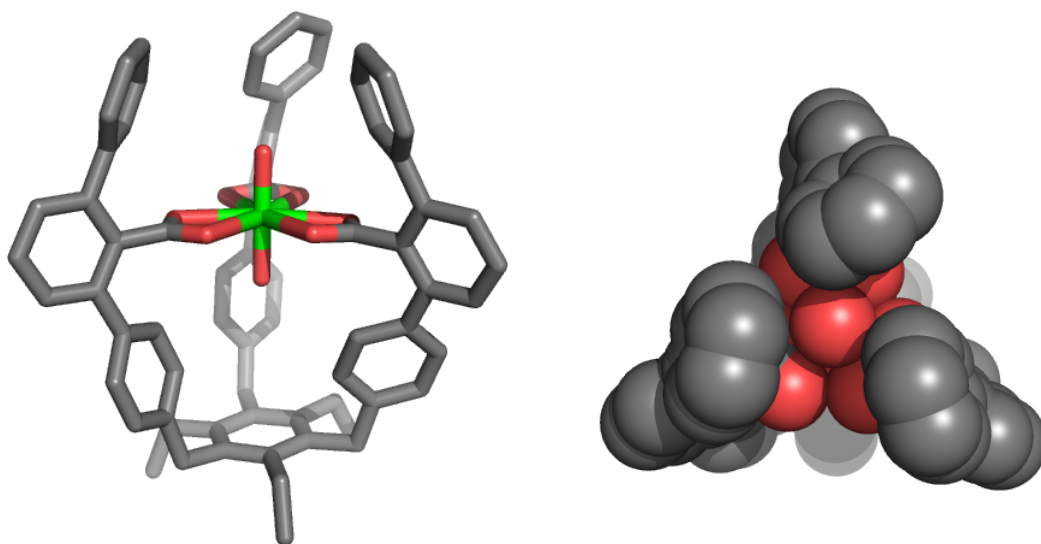

Et<sub>3</sub>NH<sup>+</sup>•10UO<sub>2</sub><sup>-</sup>: C<sub>72</sub> H<sub>57</sub> O<sub>8</sub> U, C<sub>6</sub> H<sub>16</sub> N, 4(C H<sub>4</sub> O), *M* = 1518.57, Monoclinic, *P*2<sub>1</sub>/n, *a* = 14.2622(12), *b* = 18.6958(15), *c* = 26.384(2) Å, α = 90.00°, β = 93.484(3)°, γ = 90.00°, *V* = 7022.2(10) Å<sup>3</sup>, *Z* = 4, ρ<sub>calcd</sub> = 1.436 g mL<sup>-1</sup>, μ(Cu-Kα) = 7.02 mm<sup>-1</sup>, θ<sub>max</sub> = 68.00°, *T* = 100(2) K, 56112 reflections collected, *R*<sub>1</sub> = 0.0228 for 11660 reflections, *R*<sub>int</sub> = 0.030 (900 parameters) with *I* > 2σ(*I*), and *R*<sub>1</sub> = 0.0246, *wR*<sub>2</sub> = 0.0568, GooF = 1.062 for all 12372 data, CCDC #940964.

## **References**

1. J. A. Turner and W. S. Jacks, *J. Org. Chem.*, 1989, **54**, 4229.
2. A. Ana Ardá, C. Venturi, C. Nativi, O. Francesconi, G. Gabrielli, F. J. Cañada, J. Jiménez-Barbero and S. Roelens, *Chem.–Eur. J.*, 2010, **16**, 414.
3. D. Tilly, S. S. Samanta, A.-S. Castanet, A. De and J. Mortier, *Eur. J. Org. Chem.* 2006, 174.
4. E. Reisner, T. C. Abikoff and S. J. Lippard, *Inorg. Chem.* 2007, **46**, 10229.
5. E. Reisner and S. J. Lippard, *Eur. J. Org. Chem.*, 2008, 156.
6. Sather, A. C.; Berryman, O. B.; Rebek, J., Jr. *J. Am. Chem. Soc.* **2010**, *132*, 13572.
